# Supplementary material
Source: MDPI journal article supplement (https://www.mdpi.com/2304-6740/6/1/17)
Supplement: s1 [file s1]

**Supplementary Materials for:**  
**Bond Insertion at Distorted Si(001) Subsurface Atoms**

**Lisa Pecher and Ralf Tonner\***

---

Dr. Lisa Pecher, PD Dr. Ralf Tonner

Faculty of Chemistry and Material Sciences Center, Philipps-Universität Marburg, Hans-Meerwein-Straße 4, 35032 Marburg, Germany

\* Corresponding author PD Dr. Ralf Tonner. e-mail: [tonner@chemie.uni-marburg.de](mailto:tonner@chemie.uni-marburg.de)

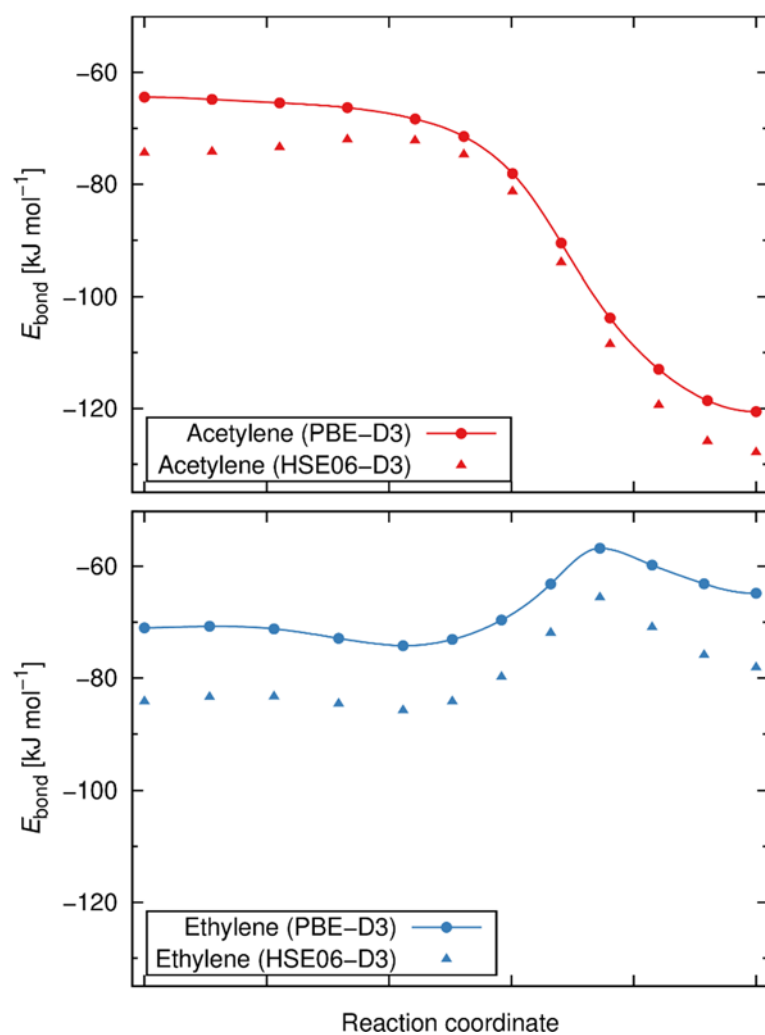

**Figure S1.** HSE06-D3 energies of the full  $\pi$  complex  $\rightarrow$  *sublayer* reaction paths, calculated on PBE-D3 structures.

## Computational Setup of Ab Initio Molecular Dynamics Simulations

All simulations were performed in VASP 5.3.5 using the same setup described for the structural optimizations in the main article, except for a less accurate SCF convergence criterion of  $10^{-5}$  eV. Trajectories were calculated using the velocity Verlet integrator [1, 2] with a time step of  $\Delta t = 1$  fs. A canonical *NVT* ensemble ( $T = 300$  K) was simulated using the Nosé thermostat [3–5] with a thermostat mass set to a value so that the energy oscillation frequency was equal to the frequency of the lowest energy vibrations of the system ( $\approx 600$  fs  $\triangleq 55$  cm $^{-1}$ ). Initially, molecule and slab were simulated separately for 20 ps starting in their respective minimum geometry to approach thermodynamic equilibrium without interference of each other. After this, coordinates and velocities were written out 10 times in intervals of 3 ps to obtain qualitatively different states of thermal excitation. At this point, molecule/surface sets were arbitrarily paired, the  $z$  coordinate of the molecular center of mass was placed 5.5 Å above the equilibrium position of an Si<sub>up</sub> atom while the  $x$  and  $y$  coordinates were displaced randomly using a true random number generator [6]. Additionally, a translation velocity vector was added to the molecule to simulate the effect of gas escaping a nozzle into ultra-high vacuum. The absolute value of the vector was chosen as the mean speed  $\langle v \rangle$  of a Maxwell-Boltzmann distribution of the molecule, while the direction was again chosen randomly using a true number generator. As a restriction, the  $z$  component of the vector was ensured to point into the direction of the surface.

The ten simulations performed this way are attached as xyz trajectories. It should be noted that only every tenth set of coordinates was written into this file, therefore the interval between two structures is  $\Delta t = 10$  fs.

## References

1. Verlet, L. Computer “Experiments” on Classical Fluids: I. Thermodynamical Properties of Lennard-Jones Molecules. *Phys. Rev.* **1967**, *159*, 98–103.
2. Swope, W. C.; Andersen, H. C.; Berens, P. H.; Wilson, K. R. A Computer Simulation Method for the Calculation of Equilibrium Constants for the Formation of Physical Clusters of Molecules: Application to Small Water Clusters. *J. Chem. Phys.* **1982**, *76*, 637–649.

3. Nosé, S. A Unified Formulation of the Constant Temperature Molecular Dynamics Methods. *J. Chem. Phys.* **1984**, *81*, 511–519.
4. Nosé, S. Constant Temperature Molecular Dynamics Methods. *Prog. Theor. Phys. Suppl.* **1991**, *103*, 1–46.
5. Bylander, D. M.; Kleinman, L. Energy Fluctuations Induced by the Nosé Thermostat *Phys. Rev. B* **1992**, *46*, 13756–13761.
6. Random Decimal Fraction Generator. <http://www.random.org/decimal-fractions>.

## Cartesian Coordinates and Total Energies

Acetylene molecule: E(PBE-D3) = -22.980927 eV, E(HSE06-D3) = -26.699781 eV

```
1.0000000000000000
15.3244190216000007 0.0000000000000000 0.0000000000000000
0.0000000000000000 15.3244190216000007 0.0000000000000000
0.0000000000000000 0.0000000000000000 21.6720008849999992
H C
2 2
Direct
0.1305110964652343 0.0636391859910432 0.5537117547401493
0.1305097330926088 0.2821911218937103 0.5537101263064983
0.1305097773154102 0.1335178988282735 0.5537100021725792
0.1305120251267340 0.2123184822869746 0.5537073367807608
```

Ethylene molecule: E(PBE-D3) = -32.031858 eV, E(HSE06-D3) = -36.940415 eV

```
1.0000000000000000
15.3244190216000007 0.0000000000000000 0.0000000000000000
0.0000000000000000 15.3244190216000007 0.0000000000000000
0.0000000000000000 0.0000000000000000 21.6720008849999992
H C
4 2
Direct
0.2564087651495759 0.6030031715664246 0.5537102103170229
0.1351245339580668 0.6030037972394413 0.5537099873776367
0.1351229662449559 0.4410824244197655 0.5537092077387537
0.2564074460701332 0.4410812097376029 0.5537097041945112
0.1957663619288062 0.5655380467621491 0.5537102818415032
0.1957658427890995 0.4785471266497333 0.5537096090751004
```

Slab 4x4 cell: E(PBE-D3) = -627.241303 eV, E(HSE06-D3) = -725.272510 eV

```
1.0000000000000000
15.3244190216000007 0.0000000000000000 0.0000000000000000
0.0000000000000000 15.3244190216000007 0.0000000000000000
0.0000000000000000 0.0000000000000000 21.6720008849999992
Si H
96 32
Selective dynamics
```

Direct

0.0000000000000000 0.0000000000000000 0.0438344851055064 F F F  
0.5000000319229088 0.0000000000000000 0.0438344851055064 F F F  
0.0000000000000000 0.2500000159614544 0.0438344851055064 F F F  
0.5000000319229088 0.2500000159614544 0.0438344851055064 F F F  
0.2500000159614544 0.0000000000000000 0.0438344851055064 F F F  
0.7500000478843631 0.0000000000000000 0.0438344851055064 F F F  
0.0000000000000000 0.5000000319229088 0.0438344851055064 F F F  
0.5000000319229088 0.5000000319229088 0.0438344851055064 F F F  
0.2500000159614544 0.2500000159614544 0.0438344851055064 F F F  
0.7500000478843631 0.2500000159614544 0.0438344851055064 F F F  
0.0000000000000000 0.7500000478843631 0.0438344851055064 F F F  
0.5000000319229088 0.7500000478843631 0.0438344851055064 F F F  
0.2500000159614544 0.5000000319229088 0.0438344851055064 F F F  
0.7500000478843631 0.5000000319229088 0.0438344851055064 F F F  
0.2500000159614544 0.7500000478843631 0.0438344851055064 F F F  
0.7500000478843631 0.7500000478843631 0.0438344851055064 F F F  
0.1249999753530631 0.0000000000000000 0.1063344825532511 F F F  
0.6250000072759718 0.0000000000000000 0.1063344825532511 F F F  
0.1249999753530631 0.2500000159614544 0.1063344825532511 F F F  
0.6250000072759718 0.2500000159614544 0.1063344825532511 F F F  
0.3749999913145174 0.0000000000000000 0.1063344825532511 F F F  
0.8750000232374191 0.0000000000000000 0.1063344825532511 F F F  
0.1249999753530631 0.5000000319229088 0.1063344825532511 F F F  
0.6250000072759718 0.5000000319229088 0.1063344825532511 F F F  
0.3749999913145174 0.2500000159614544 0.1063344825532511 F F F  
0.8750000232374191 0.2500000159614544 0.1063344825532511 F F F  
0.1249999753530631 0.7500000478843631 0.1063344825532511 F F F  
0.6250000072759718 0.7500000478843631 0.1063344825532511 F F F  
0.3749999913145174 0.5000000319229088 0.1063344825532511 F F F  
0.8750000232374191 0.5000000319229088 0.1063344825532511 F F F  
0.3749999913145174 0.7500000478843631 0.1063344825532511 F F F  
0.8750000232374191 0.7500000478843631 0.1063344825532511 F F F  
0.1249999753530631 0.1244328412915507 0.1659650172167275 T T T  
0.6250000072759718 0.1244328412915507 0.1659650172167275 T T T  
0.1249999753530631 0.3749999913145174 0.1727998729730587 T T T  
0.6250000072759718 0.3749999913145174 0.1727998729730587 T T T  
0.3749999913145174 0.1255671746699036 0.1659651095016983 T T T  
0.8750000232374191 0.1255671746699036 0.1659651095016983 T T T  
0.1249999753530631 0.6255670760821488 0.1659650633592165 T T T  
0.6250000072759718 0.6255670760821488 0.1659650633592165 T T T  
0.3749999913145174 0.3749999913145174 0.1715938468133729 T T T  
0.8750000232374191 0.3749999913145174 0.1715938468133729 T T T  
0.1249999753530631 0.8750000232374191 0.1715937083859131 T T T  
0.6250000072759718 0.8750000232374191 0.1715937083859131 T T T  
0.3749999913145174 0.6244328079591313 0.1659651095016983 T T T  
0.8750000232374191 0.6244328079591313 0.1659651095016983 T T T  
0.3749999913145174 0.8750000232374191 0.1727998729730587 T T T  
0.8750000232374191 0.8750000232374191 0.1727998729730587 T T T  
0.0000000000000000 0.1250003016297043 0.2266963731715421 T T T  
0.5000000319229088 0.1250003016297043 0.2266963731715421 T T T  
0.4991361818819158 0.3749999913145174 0.2373427367087331 T T T  
0.9991362138048174 0.3749999913145174 0.2373427367087331 T T T  
0.2499999507061261 0.1250003016297043 0.2266963731715421 T T T  
0.7499999826290349 0.1250003016297043 0.2266963731715421 T T T  
0.0000000000000000 0.6249996809993235 0.2266963731715421 T T T  
0.5000000319229088 0.6249996809993235 0.2266963731715421 T T T

0.2508638007471191 0.3749999913145174 0.2373427367087331 T T T  
0.7508638326700208 0.3749999913145174 0.2373427367087331 T T T  
0.0008639805516495 0.8750000232374191 0.2373425059963026 T T T  
0.5008639472192300 0.8750000232374191 0.2373425059963026 T T T  
0.2499999507061261 0.6249996809993235 0.2266963731715421 T T T  
0.7499999826290349 0.6249996809993235 0.2266963731715421 T T T  
0.2491360354098049 0.8750000232374191 0.2373425059963026 T T T  
0.7491360673327065 0.8750000232374191 0.2373425059963026 T T T  
0.0081232443347119 0.0056880459792410 0.2964413869347240 T T T  
0.5081232110022924 0.0056880459792410 0.2964413869347240 T T T  
0.4918770486095099 0.2443120352375416 0.2964417560746142 T T T  
0.9918770805324115 0.2443120352375416 0.2964417560746142 T T T  
0.2418767716267425 0.0056880459792410 0.2964413869347240 T T T  
0.7418768035496441 0.0056880459792410 0.2964413869347240 T T T  
0.4918771138648381 0.5056879473914861 0.2964417560746142 T T T  
0.9918770805324115 0.5056879473914861 0.2964417560746142 T T T  
0.2581228687641968 0.2443121004928699 0.2964417560746142 T T T  
0.7581228354317773 0.2443121004928699 0.2964417560746142 T T T  
0.0081231790793836 0.7443120019051221 0.2964413869347240 T T T  
0.5081231457469642 0.7443120019051221 0.2964413869347240 T T T  
0.2581229340195250 0.5056878821361579 0.2964418022171031 T T T  
0.7581229006871055 0.5056878821361579 0.2964418022171031 T T T  
0.2418767716267425 0.7443120019051221 0.2964414330772129 T T T  
0.7418768035496441 0.7443120019051221 0.2964414330772129 T T T  
0.1249999753530631 0.0405486824083923 0.3650851641241957 T T T  
0.6250000072759718 0.0405486824083923 0.3650851641241957 T T T  
0.1249999753530631 0.1876281244951130 0.3309699477247889 T T T  
0.6250000072759718 0.1876281244951130 0.3309699477247889 T T T  
0.3749999913145174 0.0623711084024023 0.3309694862999280 T T T  
0.8750000232374191 0.0623711084024023 0.3309694862999280 T T T  
0.1249999753530631 0.5623719233892501 0.3309699477247889 T T T  
0.6250000072759718 0.5623719233892501 0.3309699477247889 T T T  
0.3749999913145174 0.2094503547231312 0.3650850256967431 T T T  
0.8750000232374191 0.2094503547231312 0.3650850256967431 T T T  
0.1249999753530631 0.7094513002206355 0.3650851641241957 T T T  
0.6250000072759718 0.7094513002206355 0.3650851641241957 T T T  
0.3749999913145174 0.5405496279059037 0.3650850718392249 T T T  
0.8750000232374191 0.5405496279059037 0.3650850718392249 T T T  
0.3749999913145174 0.6876288742266325 0.3309694862999280 T T T  
0.8750000232374191 0.6876288742266325 0.3309694862999280 T T T  
0.0000000000000000 0.1711557218778097 0.0044114523853764 F F F  
0.5000000319229088 0.1711557218778097 0.0044114523853764 F F F  
0.0000000000000000 0.3288443100450991 0.0044114523853764 F F F  
0.5000000319229088 0.3288443100450991 0.0044114523853764 F F F  
0.0000000000000000 0.4211557378392641 0.0044114523853764 F F F  
0.5000000319229088 0.4211557378392641 0.0044114523853764 F F F  
0.0000000000000000 0.0788442940836447 0.0044114523853764 F F F  
0.5000000319229088 0.0788442940836447 0.0044114523853764 F F F  
0.2500000159614544 0.0788442940836447 0.0044114523853764 F F F  
0.7500000478843631 0.0788442940836447 0.0044114523853764 F F F  
0.2500000159614544 0.1711557218778097 0.0044114523853764 F F F  
0.7500000478843631 0.1711557218778097 0.0044114523853764 F F F  
0.2500000159614544 0.3288443100450991 0.0044114523853764 F F F  
0.7500000478843631 0.3288443100450991 0.0044114523853764 F F F  
0.2500000159614544 0.4211557378392641 0.0044114523853764 F F F  
0.7500000478843631 0.4211557378392641 0.0044114523853764 F F F  
0.0000000000000000 0.6711557538007185 0.0044114523853764 F F F

0.5000000319229088 0.6711557538007185 0.0044114523853764 F F F  
0.0000000000000000 0.8288443419680007 0.0044114523853764 F F F  
0.5000000319229088 0.8288443419680007 0.0044114523853764 F F F  
0.0000000000000000 0.9211557697621728 0.0044114523853764 F F F  
0.5000000319229088 0.9211557697621728 0.0044114523853764 F F F  
0.0000000000000000 0.5788443260065463 0.0044114523853764 F F F  
0.5000000319229088 0.5788443260065463 0.0044114523853764 F F F  
0.2500000159614544 0.5788443260065463 0.0044114523853764 F F F  
0.7500000478843631 0.5788443260065463 0.0044114523853764 F F F  
0.2500000159614544 0.6711557538007185 0.0044114523853764 F F F  
0.7500000478843631 0.6711557538007185 0.0044114523853764 F F F  
0.2500000159614544 0.8288443419680007 0.0044114523853764 F F F  
0.7500000478843631 0.8288443419680007 0.0044114523853764 F F F  
0.2500000159614544 0.9211557697621728 0.0044114523853764 F F F  
0.7500000478843631 0.9211557697621728 0.0044114523853764 F F F

Acetylene pi complex TS: E(PBE-D3) = -650.88722 eV, E(HSE06-D3) = -752.7432 eV

1.0000000000000000  
15.3244190216000007 0.0000000000000000 0.0000000000000000  
0.0000000000000000 15.3244190216000007 0.0000000000000000  
0.0000000000000000 0.0000000000000000 21.6720000000000006

Si H C

96 34 2

Selective dynamics

Direct

0.0000000000000000 0.0000000000000000 0.0438344407530458 F F F  
0.5000000319229088 0.0000000000000000 0.0438344407530458 F F F  
0.0000000000000000 0.2500003422380956 0.0438344407530458 F F F  
0.5000000319229088 0.2500003422380956 0.0438344407530458 F F F  
0.2500003422380956 0.0000000000000000 0.0438344407530458 F F F  
0.7500003741610044 0.0000000000000000 0.0438344407530458 F F F  
0.0000000000000000 0.5000000319229088 0.0438344407530458 F F F  
0.5000000319229088 0.5000000319229088 0.0438344407530458 F F F  
0.2500003422380956 0.2500003422380956 0.0438344407530458 F F F  
0.7500003741610044 0.2500003422380956 0.0438344407530458 F F F  
0.0000000000000000 0.7500003741610044 0.0438344407530458 F F F  
0.5000000319229088 0.7500003741610044 0.0438344407530458 F F F  
0.2500003422380956 0.5000000319229088 0.0438344407530458 F F F  
0.7500003741610044 0.5000000319229088 0.0438344407530458 F F F  
0.2500003422380956 0.7500003741610044 0.0438344407530458 F F F  
0.7500003741610044 0.7500003741610044 0.0438344407530458 F F F  
0.1249998448424066 0.0000000000000000 0.1063344407530472 F F F  
0.6249998767653153 0.0000000000000000 0.1063344407530472 F F F  
0.1249998448424066 0.2500003422380956 0.1063344407530472 F F F  
0.6249998767653153 0.2500003422380956 0.1063344407530472 F F F  
0.3750001870805022 0.0000000000000000 0.1063344407530472 F F F  
0.8750002190034110 0.0000000000000000 0.1063344407530472 F F F  
0.1249998448424066 0.5000000319229088 0.1063344407530472 F F F  
0.6249998767653153 0.5000000319229088 0.1063344407530472 F F F  
0.3750001870805022 0.2500003422380956 0.1063344407530472 F F F  
0.8750002190034110 0.2500003422380956 0.1063344407530472 F F F  
0.1249998448424066 0.7500003741610044 0.1063344407530472 F F F  
0.6249998767653153 0.7500003741610044 0.1063344407530472 F F F  
0.3750001870805022 0.5000000319229088 0.1063344407530472 F F F  
0.8750002190034110 0.5000000319229088 0.1063344407530472 F F F  
0.3750001870805022 0.7500003741610044 0.1063344407530472 F F F

|                    |                    |                    |   |   |   |
|--------------------|--------------------|--------------------|---|---|---|
| 0.8750002190034110 | 0.7500003741610044 | 0.1063344407530472 | F | F | F |
| 0.1250006666175048 | 0.1245252807544122 | 0.1660546784676950 | T | T | T |
| 0.6250014365878349 | 0.1243180226610173 | 0.1658348762687102 | T | T | T |
| 0.3755190870336298 | 0.1254301297115819 | 0.1661543799081530 | T | T | T |
| 0.8744831663252579 | 0.1254290505839537 | 0.1661538284132852 | T | T | T |
| 0.3751176645363245 | 0.3749430004579620 | 0.1715559654826084 | T | T | T |
| 0.8748878281923217 | 0.3749467293567283 | 0.1715517860078498 | T | T | T |
| 0.1250014670553342 | 0.3751036178686163 | 0.1727161894036905 | T | T | T |
| 0.6250008569385973 | 0.3752643787726702 | 0.1725718787768803 | T | T | T |
| 0.3750195702869998 | 0.6244068527955952 | 0.1659255864971650 | T | T | T |
| 0.8749818793092100 | 0.6244069983589103 | 0.1659252553515297 | T | T | T |
| 0.1250014138889802 | 0.6256235655902174 | 0.1659843697939475 | T | T | T |
| 0.6250008704664625 | 0.6256049522587427 | 0.1659629426556481 | T | T | T |
| 0.1249983055781725 | 0.8750415116065273 | 0.1716147820526294 | T | T | T |
| 0.6249995327508209 | 0.8749909324865361 | 0.1715576037888981 | T | T | T |
| 0.3751069171567468 | 0.8750288901059340 | 0.1728356008642035 | T | T | T |
| 0.8748921423222353 | 0.8750295466632623 | 0.1728365298815249 | T | T | T |
| 0.9997997736000279 | 0.1253372567356275 | 0.2265966673702905 | T | T | T |
| 0.5004687617972299 | 0.1243445821525537 | 0.2267419937141101 | T | T | T |
| 0.2501991367966772 | 0.1253345963259917 | 0.2265962657835884 | T | T | T |
| 0.7495345016076040 | 0.1243485875752729 | 0.2267409519227365 | T | T | T |
| 0.4995245962479516 | 0.3751759512465079 | 0.2372500994789153 | T | T | T |
| 0.9990699789779072 | 0.3754395216748389 | 0.2371758952138920 | T | T | T |
| 0.2509316512799644 | 0.3754360973961559 | 0.2371770048123190 | T | T | T |
| 0.7504832145182960 | 0.3751851127156813 | 0.2372417956240490 | T | T | T |
| 0.4999762111989450 | 0.6250621876616202 | 0.2266945301119321 | T | T | T |
| 0.9999480692656834 | 0.6252245691531458 | 0.2266785711368350 | T | T | T |
| 0.2500541221457619 | 0.6252230447579459 | 0.2266803295348140 | T | T | T |
| 0.7500261982070825 | 0.6250661491979722 | 0.2266946962786174 | T | T | T |
| 0.0008597218056270 | 0.8753366735356392 | 0.2373630938227660 | T | T | T |
| 0.5009153988356181 | 0.8754912349282034 | 0.2373497182966700 | T | T | T |
| 0.2491373238012679 | 0.8753335454766210 | 0.2373613424590168 | T | T | T |
| 0.7490824220522253 | 0.8754943967568293 | 0.2373510169906185 | T | T | T |
| 0.2423252055981697 | 0.0062342628438002 | 0.2964233806020526 | T | T | T |
| 0.7403620377908132 | 0.0056449031624658 | 0.2969418797369636 | T | T | T |
| 0.0076615338709801 | 0.0062379836869111 | 0.2964231438353581 | T | T | T |
| 0.5096180650759353 | 0.0056417668779997 | 0.2969389267984416 | T | T | T |
| 0.4936011323529581 | 0.2428551326892864 | 0.2941457433249664 | T | T | T |
| 0.9919820359336683 | 0.2449670367752724 | 0.2961732382067505 | T | T | T |
| 0.2580158908064873 | 0.2449625241036925 | 0.2961723284723050 | T | T | T |
| 0.7564085861914008 | 0.2428730047847782 | 0.2941304193615323 | T | T | T |
| 0.4919238360379786 | 0.5056971218825479 | 0.2964663330370134 | T | T | T |
| 0.9917778098907792 | 0.5059098530918561 | 0.2964235915519290 | T | T | T |
| 0.2582243942251872 | 0.5059065012842948 | 0.2964241952986438 | T | T | T |
| 0.7580803748382485 | 0.5056992880569919 | 0.2964648634178528 | T | T | T |
| 0.0080275368252377 | 0.7445810203996691 | 0.2964452879473709 | T | T | T |
| 0.5081598479681509 | 0.7446079242613984 | 0.2963380290573709 | T | T | T |
| 0.2419726497320299 | 0.7445798635933916 | 0.2964472911074444 | T | T | T |
| 0.7418401878981852 | 0.7446102963963611 | 0.2963389661328085 | T | T | T |
| 0.1249944776216103 | 0.0412848143315799 | 0.3646572308578727 | T | T | T |
| 0.6249888364716513 | 0.0389594455940073 | 0.3673442815771293 | T | T | T |
| 0.3761847746411511 | 0.0620932023598332 | 0.3303227194163778 | T | T | T |
| 0.8737979136033609 | 0.0620947708251618 | 0.3303206565096906 | T | T | T |
| 0.1249986693518464 | 0.1880788738743027 | 0.3310280480346278 | T | T | T |
| 0.6250215609221003 | 0.1930134623913310 | 0.3425948858738429 | T | T | T |
| 0.3762024966172945 | 0.2096995797949958 | 0.3627293235849394 | T | T | T |
| 0.8737869673267661 | 0.2097031023775195 | 0.3627236418788335 | T | T | T |



|                    |                    |                    |   |   |   |
|--------------------|--------------------|--------------------|---|---|---|
| 0.3750647064440678 | 0.5406614736473180 | 0.3651791069488279 | T | T | T |
| 0.8749373344237427 | 0.5406648041097856 | 0.3651782179999635 | T | T | T |
| 0.1250005711602141 | 0.5624277406225555 | 0.3308332246074486 | T | T | T |
| 0.6250021957802936 | 0.5626273627747990 | 0.3308625499446856 | T | T | T |
| 0.3751360069331382 | 0.6878647062912273 | 0.3309419797246219 | T | T | T |
| 0.8748644926023625 | 0.6878662500181026 | 0.3309403591398191 | T | T | T |
| 0.1249990894899861 | 0.7094028571092931 | 0.3649604633478431 | T | T | T |
| 0.6250001052296020 | 0.7096297870973695 | 0.3650112454148698 | T | T | T |
| 0.0000000000000000 | 0.1711555913671532 | 0.0044116832779651 | F | F | F |
| 0.5000000319229088 | 0.1711555913671532 | 0.0044116832779651 | F | F | F |
| 0.0000000000000000 | 0.3288444405557556 | 0.0044116832779651 | F | F | F |
| 0.5000000319229088 | 0.3288444405557556 | 0.0044116832779651 | F | F | F |
| 0.0000000000000000 | 0.4211559336052488 | 0.0044116832779651 | F | F | F |
| 0.5000000319229088 | 0.4211559336052488 | 0.0044116832779651 | F | F | F |
| 0.0000000000000000 | 0.0788440983176599 | 0.0044116832779651 | F | F | F |
| 0.5000000319229088 | 0.0788440983176599 | 0.0044116832779651 | F | F | F |
| 0.2500003422380956 | 0.0788440983176599 | 0.0044116832779651 | F | F | F |
| 0.7500003741610044 | 0.0788440983176599 | 0.0044116832779651 | F | F | F |
| 0.2500003422380956 | 0.1711555913671532 | 0.0044116832779651 | F | F | F |
| 0.7500003741610044 | 0.1711555913671532 | 0.0044116832779651 | F | F | F |
| 0.2500003422380956 | 0.3288444405557556 | 0.0044116832779651 | F | F | F |
| 0.7500003741610044 | 0.3288444405557556 | 0.0044116832779651 | F | F | F |
| 0.2500003422380956 | 0.4211559336052488 | 0.0044116832779651 | F | F | F |
| 0.7500003741610044 | 0.4211559336052488 | 0.0044116832779651 | F | F | F |
| 0.0000000000000000 | 0.6711556232900620 | 0.0044116832779651 | F | F | F |
| 0.5000000319229088 | 0.6711556232900620 | 0.0044116832779651 | F | F | F |
| 0.0000000000000000 | 0.8288444724786572 | 0.0044116832779651 | F | F | F |
| 0.5000000319229088 | 0.8288444724786572 | 0.0044116832779651 | F | F | F |
| 0.0000000000000000 | 0.9211559655281576 | 0.0044116832779651 | F | F | F |
| 0.5000000319229088 | 0.9211559655281576 | 0.0044116832779651 | F | F | F |
| 0.0000000000000000 | 0.5788441302405616 | 0.0044116832779651 | F | F | F |
| 0.5000000319229088 | 0.5788441302405616 | 0.0044116832779651 | F | F | F |
| 0.2500003422380956 | 0.5788441302405616 | 0.0044116832779651 | F | F | F |
| 0.7500003741610044 | 0.5788441302405616 | 0.0044116832779651 | F | F | F |
| 0.2500003422380956 | 0.6711556232900620 | 0.0044116832779651 | F | F | F |
| 0.7500003741610044 | 0.6711556232900620 | 0.0044116832779651 | F | F | F |
| 0.2500003422380956 | 0.8288444724786572 | 0.0044116832779651 | F | F | F |
| 0.7500003741610044 | 0.8288444724786572 | 0.0044116832779651 | F | F | F |
| 0.2500003422380956 | 0.9211559655281576 | 0.0044116832779651 | F | F | F |
| 0.7500003741610044 | 0.9211559655281576 | 0.0044116832779651 | F | F | F |
| 0.7347491047282571 | 0.2659729259038536 | 0.4357473417513883 | T | T | T |
| 0.5151598367667323 | 0.2665647614155204 | 0.4355958559534798 | T | T | T |
| 0.6653961093038254 | 0.2616152726014087 | 0.4256566728919626 | T | T | T |
| 0.5845236592269664 | 0.2619078744210209 | 0.4256272656677248 | T | T | T |

Acetylene sublayer mode: E(PBE-D3) = -651.46949 eV, E(HSE06-D3) = -753.2978 eV

1.0000000000000000

15.3244190216000007 0.0000000000000000 0.0000000000000000

0.0000000000000000 15.3244190216000007 0.0000000000000000

0.0000000000000000 0.0000000000000000 21.6720000000000006

Si H C

96 34 2

Selective dynamics

Direct

0.0000000000000000 0.0000000000000000 0.0438344633914134 F F F

0.5000000000000000 0.0000000000000000 0.0438344633914134 F F F

|                    |                    |                    |   |   |   |
|--------------------|--------------------|--------------------|---|---|---|
| 0.0000000000000000 | 0.2500001695033731 | 0.0438344633914134 | F | F | F |
| 0.5000000000000000 | 0.2500001695033731 | 0.0438344633914134 | F | F | F |
| 0.2500001695034015 | 0.0000000000000000 | 0.0438344633914134 | F | F | F |
| 0.7500001695034015 | 0.0000000000000000 | 0.0438344633914134 | F | F | F |
| 0.0000000000000000 | 0.5000000319229088 | 0.0438344633914134 | F | F | F |
| 0.5000000000000000 | 0.5000000319229088 | 0.0438344633914134 | F | F | F |
| 0.2500001695034015 | 0.2500001695033731 | 0.0438344633914134 | F | F | F |
| 0.7500001695034015 | 0.2500001695033731 | 0.0438344633914134 | F | F | F |
| 0.0000000000000000 | 0.7500002014262819 | 0.0438344633914134 | F | F | F |
| 0.5000000000000000 | 0.7500002014262819 | 0.0438344633914134 | F | F | F |
| 0.2500001695034015 | 0.5000000319229088 | 0.0438344633914134 | F | F | F |
| 0.7500001695034015 | 0.5000000319229088 | 0.0438344633914134 | F | F | F |
| 0.2500001695034015 | 0.7500002014262819 | 0.0438344633914134 | F | F | F |
| 0.7500001695034015 | 0.7500002014262819 | 0.0438344633914134 | F | F | F |
| 0.1249999139362856 | 0.0000000000000000 | 0.1063344608391595 | F | F | F |
| 0.6249999139362927 | 0.0000000000000000 | 0.1063344608391595 | F | F | F |
| 0.1249999139362856 | 0.2500001695033731 | 0.1063344608391595 | F | F | F |
| 0.6249999139362927 | 0.2500001695033731 | 0.1063344608391595 | F | F | F |
| 0.3750000834396943 | 0.0000000000000000 | 0.1063344608391595 | F | F | F |
| 0.8750000834396942 | 0.0000000000000000 | 0.1063344608391595 | F | F | F |
| 0.1249999139362856 | 0.5000000319229088 | 0.1063344608391595 | F | F | F |
| 0.6249999139362927 | 0.5000000319229088 | 0.1063344608391595 | F | F | F |
| 0.3750000834396943 | 0.2500001695033731 | 0.1063344608391595 | F | F | F |
| 0.8750000834396942 | 0.2500001695033731 | 0.1063344608391595 | F | F | F |
| 0.1249999139362856 | 0.7500002014262819 | 0.1063344608391595 | F | F | F |
| 0.6249999139362927 | 0.7500002014262819 | 0.1063344608391595 | F | F | F |
| 0.3750000834396943 | 0.5000000319229088 | 0.1063344608391595 | F | F | F |
| 0.8750000834396942 | 0.5000000319229088 | 0.1063344608391595 | F | F | F |
| 0.3750000834396943 | 0.7500002014262819 | 0.1063344608391595 | F | F | F |
| 0.8750000834396942 | 0.7500002014262819 | 0.1063344608391595 | F | F | F |
| 0.1261415107111612 | 0.1241787674019322 | 0.1656371503079389 | T | T | T |
| 0.6248046258157458 | 0.1250746016190846 | 0.1666604729294092 | T | T | T |
| 0.3815779330764969 | 0.1264720419717380 | 0.1686784745484638 | T | T | T |
| 0.8783561410645134 | 0.1248197848760952 | 0.1651050688976819 | T | T | T |
| 0.3714993558802586 | 0.3756984349476303 | 0.1699934416296596 | T | T | T |
| 0.8726399606328915 | 0.3747468728429205 | 0.1718450179606317 | T | T | T |
| 0.1225766523267358 | 0.3750158648644865 | 0.1727593413306285 | T | T | T |
| 0.6227487357193862 | 0.3750249336679288 | 0.1727747604747005 | T | T | T |
| 0.3749538828648186 | 0.6245336527622103 | 0.1658684261489172 | T | T | T |
| 0.8749590921902926 | 0.6242509690819675 | 0.1659886858723530 | T | T | T |
| 0.1250450605672485 | 0.6255348772924492 | 0.1660005647700134 | T | T | T |
| 0.6252927364674002 | 0.6256350720813491 | 0.1659322018642159 | T | T | T |
| 0.1259487816336666 | 0.8747650240616407 | 0.1712930064888697 | T | T | T |
| 0.6254175858691771 | 0.8748704526495947 | 0.1714039330266842 | T | T | T |
| 0.3763318995192552 | 0.8753254551827133 | 0.1731059818843307 | T | T | T |
| 0.8765942770882926 | 0.8744031601938808 | 0.1720695518520027 | T | T | T |
| 0.0018999353294191 | 0.1237993697875384 | 0.2276596988300613 | T | T | T |
| 0.5061466758748585 | 0.1320929875916838 | 0.2350210604519200 | T | T | T |
| 0.2521687169914515 | 0.1237017444796345 | 0.2246354796886945 | T | T | T |
| 0.7528344085848691 | 0.1206827341930428 | 0.2226272570798284 | T | T | T |
| 0.4938883073100476 | 0.3788808500173526 | 0.2348857296375180 | T | T | T |
| 0.9963899317026081 | 0.3738507628325412 | 0.2379931749470892 | T | T | T |
| 0.2481690004753853 | 0.3757847317042090 | 0.2364568549402109 | T | T | T |
| 0.7479030606477202 | 0.3735199666894716 | 0.2378452440341037 | T | T | T |
| 0.5001059373213367 | 0.6276988802128526 | 0.2263908028019989 | T | T | T |
| 0.9999618159858650 | 0.6240626471842198 | 0.2267102000391062 | T | T | T |
| 0.2500806142507304 | 0.6248723073751534 | 0.2266646802386839 | T | T | T |

|                    |                    |                    |   |   |   |
|--------------------|--------------------|--------------------|---|---|---|
| 0.7501388657012467 | 0.6231258580381033 | 0.2268217640836583 | T | T | T |
| 0.0021663614394673 | 0.8737574040550212 | 0.2371194112118881 | T | T | T |
| 0.5024775718985892 | 0.8783096015397511 | 0.2386065460528874 | T | T | T |
| 0.2499922078204480 | 0.8745500697988013 | 0.2368702869943923 | T | T | T |
| 0.7510217482659894 | 0.8716083824054690 | 0.2352897672929847 | T | T | T |
| 0.2455653968888287 | 0.0056640106373767 | 0.2946984534054443 | T | T | T |
| 0.7475776088663099 | 0.0018508338776546 | 0.2922968612985273 | T | T | T |
| 0.0126058644671690 | 0.0029851859735496 | 0.2974436688398458 | T | T | T |
| 0.5155435066993848 | 0.0080002655720492 | 0.3007077187026028 | T | T | T |
| 0.4827716296267632 | 0.2572428228873596 | 0.3010042609250104 | T | T | T |
| 0.9853204486965441 | 0.2435167337743266 | 0.2984764290787107 | T | T | T |
| 0.2481757889110223 | 0.2430249900043041 | 0.2921448507331763 | T | T | T |
| 0.7570867848349476 | 0.2369618738232973 | 0.2899580275634130 | T | T | T |
| 0.4897474095831694 | 0.5079635524207619 | 0.2953692427015128 | T | T | T |
| 0.9904367379293074 | 0.5048696805563576 | 0.2969085219276767 | T | T | T |
| 0.2570603765454252 | 0.5056407898183715 | 0.2962683298471347 | T | T | T |
| 0.7563252437265937 | 0.5041601079946193 | 0.2970196201334492 | T | T | T |
| 0.0085509275571758 | 0.7433210722263024 | 0.2965343112200777 | T | T | T |
| 0.5086068284436995 | 0.7464043629019868 | 0.2968191794246031 | T | T | T |
| 0.2422172956641577 | 0.7442659906447439 | 0.2961866348132046 | T | T | T |
| 0.7422766558654786 | 0.7428511462208467 | 0.2960459301780818 | T | T | T |
| 0.1294107583306045 | 0.0388163485213541 | 0.3654559953589215 | T | T | T |
| 0.6383872220665412 | 0.0219960546370578 | 0.3697573446880640 | T | T | T |
| 0.3783273000097200 | 0.0625462156553129 | 0.3299925766132889 | T | T | T |
| 0.8791974158505181 | 0.0593821945717815 | 0.3292815864625318 | T | T | T |
| 0.1179154752391464 | 0.1854334708476076 | 0.3302755602197758 | T | T | T |
| 0.6531754358573235 | 0.1741029068190143 | 0.3541384313510717 | T | T | T |
| 0.3619626808655597 | 0.2081033681862765 | 0.3611417880051667 | T | T | T |
| 0.8685637495118025 | 0.2049873828075982 | 0.3664376783502495 | T | T | T |
| 0.3740122331050568 | 0.5410740062802066 | 0.3651087026070530 | T | T | T |
| 0.8736321368349769 | 0.5398839891988175 | 0.3654036201481987 | T | T | T |
| 0.1238400661394556 | 0.5618480196989659 | 0.3308676846531249 | T | T | T |
| 0.6232659383096834 | 0.5623054845528008 | 0.3306287982952766 | T | T | T |
| 0.3754427072450251 | 0.6884162424323598 | 0.3308831253378904 | T | T | T |
| 0.8751938014535359 | 0.6868557020359529 | 0.3309564319902261 | T | T | T |
| 0.1254562195346998 | 0.7088421639724375 | 0.3650490000545644 | T | T | T |
| 0.6252807010032283 | 0.7094760566914998 | 0.3650984223777274 | T | T | T |
| 0.0000000000000000 | 0.1711556604610038 | 0.0044115609559584 | F | F | F |
| 0.5000000000000000 | 0.1711556604610038 | 0.0044115609559584 | F | F | F |
| 0.0000000000000000 | 0.3288443714619048 | 0.0044115609559584 | F | F | F |
| 0.5000000000000000 | 0.3288443714619048 | 0.0044115609559584 | F | F | F |
| 0.0000000000000000 | 0.4211558299644409 | 0.0044115609559584 | F | F | F |
| 0.5000000000000000 | 0.4211558299644409 | 0.0044115609559584 | F | F | F |
| 0.0000000000000000 | 0.0788442019584679 | 0.0044115609559584 | F | F | F |
| 0.5000000000000000 | 0.0788442019584679 | 0.0044115609559584 | F | F | F |
| 0.2500001695034015 | 0.0788442019584679 | 0.0044115609559584 | F | F | F |
| 0.7500001695034015 | 0.0788442019584679 | 0.0044115609559584 | F | F | F |
| 0.2500001695034015 | 0.1711556604610038 | 0.0044115609559584 | F | F | F |
| 0.7500001695034015 | 0.1711556604610038 | 0.0044115609559584 | F | F | F |
| 0.2500001695034015 | 0.3288443714619048 | 0.0044115609559584 | F | F | F |
| 0.7500001695034015 | 0.3288443714619048 | 0.0044115609559584 | F | F | F |
| 0.2500001695034015 | 0.4211558299644409 | 0.0044115609559584 | F | F | F |
| 0.7500001695034015 | 0.4211558299644409 | 0.0044115609559584 | F | F | F |
| 0.0000000000000000 | 0.6711556923839126 | 0.0044115609559584 | F | F | F |
| 0.5000000000000000 | 0.6711556923839126 | 0.0044115609559584 | F | F | F |
| 0.0000000000000000 | 0.8288444033848066 | 0.0044115609559584 | F | F | F |
| 0.5000000000000000 | 0.8288444033848066 | 0.0044115609559584 | F | F | F |

|                    |                    |                    |   |   |   |
|--------------------|--------------------|--------------------|---|---|---|
| 0.0000000000000000 | 0.9211558618873497 | 0.0044115609559584 | F | F | F |
| 0.5000000000000000 | 0.9211558618873497 | 0.0044115609559584 | F | F | F |
| 0.0000000000000000 | 0.5788442338813695 | 0.0044115609559584 | F | F | F |
| 0.5000000000000000 | 0.5788442338813695 | 0.0044115609559584 | F | F | F |
| 0.2500001695034015 | 0.5788442338813695 | 0.0044115609559584 | F | F | F |
| 0.7500001695034015 | 0.5788442338813695 | 0.0044115609559584 | F | F | F |
| 0.2500001695034015 | 0.6711556923839126 | 0.0044115609559584 | F | F | F |
| 0.7500001695034015 | 0.6711556923839126 | 0.0044115609559584 | F | F | F |
| 0.2500001695034015 | 0.8288444033848066 | 0.0044115609559584 | F | F | F |
| 0.7500001695034015 | 0.8288444033848066 | 0.0044115609559584 | F | F | F |
| 0.2500001695034015 | 0.9211558618873497 | 0.0044115609559584 | F | F | F |
| 0.7500001695034015 | 0.9211558618873497 | 0.0044115609559584 | F | F | F |
| 0.6262127334521922 | 0.2772907677210865 | 0.4517579679696315 | T | T | T |
| 0.5007046449882774 | 0.3492133568743228 | 0.3954567731282916 | T | T | T |
| 0.6053361569280216 | 0.2575820985616151 | 0.4055473082064011 | T | T | T |
| 0.5387753895739246 | 0.2953842962511297 | 0.3749619467652137 | T | T | T |

Acetylene TS sublayer -> on-top: E(PBE-D3) = -650.7846 eV, E(HSE06-D3) = -752.53247 eV

|                     |                     |                     |
|---------------------|---------------------|---------------------|
| 1.0000000000000000  |                     |                     |
| 15.3244190216000007 | 0.0000000000000000  | 0.0000000000000000  |
| 0.0000000000000000  | 15.3244190216000007 | 0.0000000000000000  |
| 0.0000000000000000  | 0.0000000000000000  | 21.6720000000000006 |

Si H C

96 34 2

Selective dynamics

Direct

|                    |                    |                    |   |   |   |
|--------------------|--------------------|--------------------|---|---|---|
| 0.0000000000000000 | 0.0000000000000000 | 0.0438344558453004 | F | F | F |
| 0.5000000106409601 | 0.0000000000000000 | 0.0438344558453004 | F | F | F |
| 0.0000000000000000 | 0.2500002270816140 | 0.0438344558453004 | F | F | F |
| 0.5000000106409601 | 0.2500002270816140 | 0.0438344558453004 | F | F | F |
| 0.2500002270816424 | 0.0000000000000000 | 0.0438344558453004 | F | F | F |
| 0.7500002377226025 | 0.0000000000000000 | 0.0438344558453004 | F | F | F |
| 0.0000000000000000 | 0.5000000319229088 | 0.0438344558453004 | F | F | F |
| 0.5000000106409601 | 0.5000000319229088 | 0.0438344558453004 | F | F | F |
| 0.2500002270816424 | 0.2500002270816140 | 0.0438344558453004 | F | F | F |
| 0.7500002377226025 | 0.2500002270816140 | 0.0438344558453004 | F | F | F |
| 0.0000000000000000 | 0.7500002590045227 | 0.0438344558453004 | F | F | F |
| 0.5000000106409601 | 0.7500002590045227 | 0.0438344558453004 | F | F | F |
| 0.2500002270816424 | 0.5000000319229088 | 0.0438344558453004 | F | F | F |
| 0.7500002377226025 | 0.5000000319229088 | 0.0438344558453004 | F | F | F |
| 0.2500002270816424 | 0.7500002590045227 | 0.0438344558453004 | F | F | F |
| 0.7500002377226025 | 0.7500002590045227 | 0.0438344558453004 | F | F | F |
| 0.1249998909050021 | 0.0000000000000000 | 0.1063344541437864 | F | F | F |
| 0.6249999015459693 | 0.0000000000000000 | 0.1063344541437864 | F | F | F |
| 0.1249998909050021 | 0.2500002270816140 | 0.1063344541437864 | F | F | F |
| 0.6249999015459693 | 0.2500002270816140 | 0.1063344541437864 | F | F | F |
| 0.3750001179866302 | 0.0000000000000000 | 0.1063344541437864 | F | F | F |
| 0.8750001286275904 | 0.0000000000000000 | 0.1063344541437864 | F | F | F |
| 0.1249998909050021 | 0.5000000319229088 | 0.1063344541437864 | F | F | F |
| 0.6249999015459693 | 0.5000000319229088 | 0.1063344541437864 | F | F | F |
| 0.3750001179866302 | 0.2500002270816140 | 0.1063344541437864 | F | F | F |
| 0.8750001286275904 | 0.2500002270816140 | 0.1063344541437864 | F | F | F |
| 0.1249998909050021 | 0.7500002590045227 | 0.1063344541437864 | F | F | F |
| 0.6249999015459693 | 0.7500002590045227 | 0.1063344541437864 | F | F | F |
| 0.3750001179866302 | 0.5000000319229088 | 0.1063344541437864 | F | F | F |
| 0.8750001286275904 | 0.5000000319229088 | 0.1063344541437864 | F | F | F |

|                     |                    |                    |   |   |   |
|---------------------|--------------------|--------------------|---|---|---|
| 0.3750001179866302  | 0.7500002590045227 | 0.1063344541437864 | F | F | F |
| 0.8750001286275904  | 0.7500002590045227 | 0.1063344541437864 | F | F | F |
| 0.1249565772743677  | 0.1244666780861497 | 0.1660757377659307 | T | T | T |
| 0.6251150836838409  | 0.1244389968180124 | 0.1656838808599388 | T | T | T |
| 0.3749917713406570  | 0.1253027111433476 | 0.1659018499106283 | T | T | T |
| 0.8748652021908213  | 0.1253266804734669 | 0.1660021405452370 | T | T | T |
| 0.3745635913060868  | 0.3751535350258343 | 0.1713342389290700 | T | T | T |
| 0.8754163284951695  | 0.3751733233689173 | 0.1713042555854437 | T | T | T |
| 0.1249610824649340  | 0.3748808034783275 | 0.1727869635171236 | T | T | T |
| 0.6250691859259754  | 0.3752269915083896 | 0.1724955639208778 | T | T | T |
| 0.3751327765125574  | 0.6244644522367060 | 0.1659499626948567 | T | T | T |
| 0.8751653608167638  | 0.6244310454250309 | 0.1659026172955448 | T | T | T |
| 0.1251820125143802  | 0.6256006558545150 | 0.1659790846722028 | T | T | T |
| 0.6253168757789251  | 0.6256582025062841 | 0.1659409540505629 | T | T | T |
| 0.1248744726192559  | 0.8750644478770929 | 0.1717161443933017 | T | T | T |
| 0.6249226564807608  | 0.8750640014676956 | 0.1716871326574474 | T | T | T |
| 0.3751887247215598  | 0.8752964098702625 | 0.1731780910076322 | T | T | T |
| 0.8744448058012815  | 0.8753553330790736 | 0.1732374272940867 | T | T | T |
| -0.0000835129478577 | 0.1251023267739841 | 0.2267545867650903 | T | T | T |
| 0.5001291474363477  | 0.1250117950363907 | 0.2257762903888066 | T | T | T |
| 0.2499360183460499  | 0.1251372367502205 | 0.2267504085722870 | T | T | T |
| 0.7501135674590141  | 0.1255675268534379 | 0.2263403883767359 | T | T | T |
| 0.4987805862148207  | 0.3753386693606562 | 0.2364688296654248 | T | T | T |
| 0.9991481614893908  | 0.3748474071842171 | 0.2373158577049096 | T | T | T |
| 0.2507778853864525  | 0.3749126303215061 | 0.2372699385619310 | T | T | T |
| 0.7512619749116622  | 0.3757842263603024 | 0.2365245202708661 | T | T | T |
| 0.5003008821337515  | 0.6259702972306755 | 0.2265340181994734 | T | T | T |
| 1.0001173567334454  | 0.6250331493908170 | 0.2266819813261780 | T | T | T |
| 0.2502219973917278  | 0.6249883301811519 | 0.2267634520438344 | T | T | T |
| 0.7502480611925385  | 0.6257494141698906 | 0.2267266947324894 | T | T | T |
| 0.0006910272243053  | 0.8752355600545068 | 0.2374540750717127 | T | T | T |
| 0.5012247346561057  | 0.8766101984312521 | 0.2378988706938139 | T | T | T |
| 0.2490083545773407  | 0.8753545467980515 | 0.2375782056583236 | T | T | T |
| 0.7483037319998532  | 0.8770370954904716 | 0.2381853329260670 | T | T | T |
| 0.2418637520631149  | 0.0061430179096319 | 0.2968824184624617 | T | T | T |
| 0.7391976488426473  | 0.0082356832449417 | 0.2978468534409006 | T | T | T |
| 0.0072213773882427  | 0.0060394969998920 | 0.2966071353153629 | T | T | T |
| 0.5091992106537010  | 0.0081356633038003 | 0.2972372076627458 | T | T | T |
| 0.4913300543858921  | 0.2434787753243456 | 0.2933031324198179 | T | T | T |
| 0.9917859331699057  | 0.2444299034229676 | 0.2964836709413234 | T | T | T |
| 0.2585138739790671  | 0.2444908219963614 | 0.2965096872436800 | T | T | T |
| 0.7584083335557767  | 0.2446483104585987 | 0.2937835470394623 | T | T | T |
| 0.4913060266305163  | 0.5061090309902530 | 0.2958399823194244 | T | T | T |
| 0.9916343814460060  | 0.5055486877918922 | 0.2963634407547784 | T | T | T |
| 0.2580558389109112  | 0.5054840253045045 | 0.2963184524802738 | T | T | T |
| 0.7583829769844304  | 0.5059102400398269 | 0.2961535801799292 | T | T | T |
| 0.0078923758619012  | 0.7443539235555018 | 0.2964150041006844 | T | T | T |
| 0.5078775171754691  | 0.7450773440406099 | 0.2965210806658618 | T | T | T |
| 0.2417707773625388  | 0.7443981002147547 | 0.2965672690374979 | T | T | T |
| 0.7418560140170176  | 0.7452984183458379 | 0.2965798777966638 | T | T | T |
| 0.1244950792103951  | 0.0409669096486819 | 0.3649143190371750 | T | T | T |
| 0.6238364068762499  | 0.0443459705552593 | 0.3689415025005016 | T | T | T |
| 0.3752486245567198  | 0.0636480825707565 | 0.3304920614589369 | T | T | T |
| 0.8735962679697803  | 0.0631543115674323 | 0.3304525091759994 | T | T | T |
| 0.1251073981163393  | 0.1879147535697229 | 0.3310721091095626 | T | T | T |
| 0.6254448773638963  | 0.1975642352736933 | 0.3350449247106782 | T | T | T |
| 0.3767121569553534  | 0.2105345405142748 | 0.3641295017523362 | T | T | T |

|                    |                    |                    |   |   |   |
|--------------------|--------------------|--------------------|---|---|---|
| 0.8735887626914381 | 0.2101964092004935 | 0.3639517198429705 | T | T | T |
| 0.3748562171491224 | 0.5403872383219004 | 0.3651546358224858 | T | T | T |
| 0.8747952316915741 | 0.5405807208616692 | 0.3651575029536424 | T | T | T |
| 0.1248528730451856 | 0.5620153407206163 | 0.3308050903988103 | T | T | T |
| 0.6250481901023138 | 0.5627460649193019 | 0.3303685945226053 | T | T | T |
| 0.3748933151711764 | 0.6877249046228223 | 0.3310681355430666 | T | T | T |
| 0.8747433055992165 | 0.6877739693207433 | 0.3310272646410116 | T | T | T |
| 0.1247706575446592 | 0.7090005454066953 | 0.3649999853559557 | T | T | T |
| 0.6247888707613000 | 0.7092946658100943 | 0.3647495176745575 | T | T | T |
| 0.0000000000000000 | 0.1711556374297203 | 0.0044116017299559 | F | F | F |
| 0.5000000106409601 | 0.1711556374297203 | 0.0044116017299559 | F | F | F |
| 0.0000000000000000 | 0.3288443944931885 | 0.0044116017299559 | F | F | F |
| 0.5000000106409601 | 0.3288443944931885 | 0.0044116017299559 | F | F | F |
| 0.0000000000000000 | 0.4211558645113769 | 0.0044116017299559 | F | F | F |
| 0.5000000106409601 | 0.4211558645113769 | 0.0044116017299559 | F | F | F |
| 0.0000000000000000 | 0.0788441674115319 | 0.0044116017299559 | F | F | F |
| 0.5000000106409601 | 0.0788441674115319 | 0.0044116017299559 | F | F | F |
| 0.2500002270816424 | 0.0788441674115319 | 0.0044116017299559 | F | F | F |
| 0.7500002377226025 | 0.0788441674115319 | 0.0044116017299559 | F | F | F |
| 0.2500002270816424 | 0.1711556374297203 | 0.0044116017299559 | F | F | F |
| 0.7500002377226025 | 0.1711556374297203 | 0.0044116017299559 | F | F | F |
| 0.2500002270816424 | 0.3288443944931885 | 0.0044116017299559 | F | F | F |
| 0.7500002377226025 | 0.3288443944931885 | 0.0044116017299559 | F | F | F |
| 0.2500002270816424 | 0.4211558645113769 | 0.0044116017299559 | F | F | F |
| 0.7500002377226025 | 0.4211558645113769 | 0.0044116017299559 | F | F | F |
| 0.0000000000000000 | 0.6711556693526290 | 0.0044116017299559 | F | F | F |
| 0.5000000106409601 | 0.6711556693526290 | 0.0044116017299559 | F | F | F |
| 0.0000000000000000 | 0.8288444264160901 | 0.0044116017299559 | F | F | F |
| 0.5000000106409601 | 0.8288444264160901 | 0.0044116017299559 | F | F | F |
| 0.0000000000000000 | 0.9211558964342856 | 0.0044116017299559 | F | F | F |
| 0.5000000106409601 | 0.9211558964342856 | 0.0044116017299559 | F | F | F |
| 0.0000000000000000 | 0.5788441993344335 | 0.0044116017299559 | F | F | F |
| 0.5000000106409601 | 0.5788441993344335 | 0.0044116017299559 | F | F | F |
| 0.2500002270816424 | 0.5788441993344335 | 0.0044116017299559 | F | F | F |
| 0.7500002377226025 | 0.5788441993344335 | 0.0044116017299559 | F | F | F |
| 0.2500002270816424 | 0.6711556693526290 | 0.0044116017299559 | F | F | F |
| 0.7500002377226025 | 0.6711556693526290 | 0.0044116017299559 | F | F | F |
| 0.2500002270816424 | 0.8288444264160901 | 0.0044116017299559 | F | F | F |
| 0.7500002377226025 | 0.8288444264160901 | 0.0044116017299559 | F | F | F |
| 0.2500002270816424 | 0.9211558964342856 | 0.0044116017299559 | F | F | F |
| 0.7500002377226025 | 0.9211558964342856 | 0.0044116017299559 | F | F | F |
| 0.6763469363541685 | 0.2239297734069160 | 0.4692377441797675 | T | T | T |
| 0.5710074171503404 | 0.3758444545652663 | 0.3862230758893999 | T | T | T |
| 0.6418800711161210 | 0.2685531314052011 | 0.4400780369911038 | T | T | T |
| 0.6027688318801424 | 0.3239202285224577 | 0.4106836088300584 | T | T | T |

Acetylene TS sublayer -> bridge: E(PBE-D3) = -651.10272 eV, E(HSE06-D3) = -752.79363 eV

1.0000000000000000

15.3244190216000007 0.0000000000000000 0.0000000000000000

0.0000000000000000 15.3244190216000007 0.0000000000000000

0.0000000000000000 0.0000000000000000 21.6720008849999992

Si H C

96 34 2

Selective dynamics

Direct

0.0000000000000000 0.0000000000000000 0.0438344579628804 F F F

|                    |                    |                    |   |   |   |
|--------------------|--------------------|--------------------|---|---|---|
| 0.5000000070939734 | 0.0000000000000000 | 0.0438344579628804 | F | F | F |
| 0.0000000000000000 | 0.2500002078888670 | 0.0438344579628804 | F | F | F |
| 0.5000000070939734 | 0.2500002078888670 | 0.0438344579628804 | F | F | F |
| 0.2500002078888954 | 0.0000000000000000 | 0.0438344579628804 | F | F | F |
| 0.7500002149828688 | 0.0000000000000000 | 0.0438344579628804 | F | F | F |
| 0.0000000000000000 | 0.5000000319229088 | 0.0438344579628804 | F | F | F |
| 0.5000000070939734 | 0.5000000319229088 | 0.0438344579628804 | F | F | F |
| 0.2500002078888954 | 0.2500002078888670 | 0.0438344579628804 | F | F | F |
| 0.7500002149828688 | 0.2500002078888670 | 0.0438344579628804 | F | F | F |
| 0.0000000000000000 | 0.7500002398117758 | 0.0438344579628804 | F | F | F |
| 0.5000000070939734 | 0.7500002398117758 | 0.0438344579628804 | F | F | F |
| 0.2500002078888954 | 0.5000000319229088 | 0.0438344579628804 | F | F | F |
| 0.7500002149828688 | 0.5000000319229088 | 0.0438344579628804 | F | F | F |
| 0.2500002078888954 | 0.7500002398117758 | 0.0438344579628804 | F | F | F |
| 0.7500002149828688 | 0.7500002398117758 | 0.0438344579628804 | F | F | F |
| 0.1249998985820966 | 0.0000000000000000 | 0.1063344554106251 | F | F | F |
| 0.6249999056760771 | 0.0000000000000000 | 0.1063344554106251 | F | F | F |
| 0.1249998985820966 | 0.2500002078888670 | 0.1063344554106251 | F | F | F |
| 0.6249999056760771 | 0.2500002078888670 | 0.1063344554106251 | F | F | F |
| 0.3750001064709849 | 0.0000000000000000 | 0.1063344554106251 | F | F | F |
| 0.8750001135649583 | 0.0000000000000000 | 0.1063344554106251 | F | F | F |
| 0.1249998985820966 | 0.5000000319229088 | 0.1063344554106251 | F | F | F |
| 0.6249999056760771 | 0.5000000319229088 | 0.1063344554106251 | F | F | F |
| 0.3750001064709849 | 0.2500002078888670 | 0.1063344554106251 | F | F | F |
| 0.8750001135649583 | 0.2500002078888670 | 0.1063344554106251 | F | F | F |
| 0.1249998985820966 | 0.7500002398117758 | 0.1063344554106251 | F | F | F |
| 0.6249999056760771 | 0.7500002398117758 | 0.1063344554106251 | F | F | F |
| 0.3750001064709849 | 0.5000000319229088 | 0.1063344554106251 | F | F | F |
| 0.8750001135649583 | 0.5000000319229088 | 0.1063344554106251 | F | F | F |
| 0.3750001064709849 | 0.7500002398117758 | 0.1063344554106251 | F | F | F |
| 0.8750001135649583 | 0.7500002398117758 | 0.1063344554106251 | F | F | F |
| 0.1212438908492006 | 0.1243614880943508 | 0.1650941687318076 | T | T | T |
| 0.6187048257112372 | 0.1255240454554788 | 0.1692595303812920 | T | T | T |
| 0.3728550308028560 | 0.1259338357933562 | 0.1670220032985089 | T | T | T |
| 0.8707843877969171 | 0.1251426411928550 | 0.1661690863608142 | T | T | T |
| 0.3752401633530249 | 0.3752579484143334 | 0.1704960742241991 | T | T | T |
| 0.8753035910556760 | 0.3747758494492204 | 0.1717503936334936 | T | T | T |
| 0.1257082243225764 | 0.3750475959012828 | 0.1725239926222591 | T | T | T |
| 0.6280293146069683 | 0.3758561715426985 | 0.1713769046526094 | T | T | T |
| 0.3752619381103913 | 0.6244108117391558 | 0.1658326116775056 | T | T | T |
| 0.8752691551073474 | 0.6243242428993709 | 0.1659358356425935 | T | T | T |
| 0.1253482998394193 | 0.6255321864438510 | 0.1659837413939054 | T | T | T |
| 0.6258232227842588 | 0.6255978935463945 | 0.1658534256602159 | T | T | T |
| 0.1250012553644799 | 0.8744770002514094 | 0.1710068091441296 | T | T | T |
| 0.6261375703076497 | 0.8746203499725959 | 0.1712616816156299 | T | T | T |
| 0.3757827959316250 | 0.8746867459351874 | 0.1726801711862280 | T | T | T |
| 0.8758534645299298 | 0.8746057520094197 | 0.1723958453600946 | T | T | T |
| 0.9969550168868733 | 0.1236805781567486 | 0.2261397622894679 | T | T | T |
| 0.4907781029227275 | 0.1249560669788700 | 0.2350757772132005 | T | T | T |
| 0.2455575734296411 | 0.1222842175433152 | 0.2249942679209463 | T | T | T |
| 0.7468340459865331 | 0.1256988611198084 | 0.2275779475592505 | T | T | T |
| 0.5014914033910699 | 0.3789355972638863 | 0.2328837657423331 | T | T | T |
| 0.0003016636806358 | 0.3747585608014579 | 0.2368834530231742 | T | T | T |
| 0.2521242180496719 | 0.3752678911260888 | 0.2366911424752995 | T | T | T |
| 0.7518695318923343 | 0.3734112054772840 | 0.2383613586207477 | T | T | T |
| 0.5005213415453390 | 0.6254917513521911 | 0.2260525787095818 | T | T | T |
| 0.0003324789459414 | 0.6244910777084530 | 0.2266101803392419 | T | T | T |

|                    |                    |                    |   |   |   |
|--------------------|--------------------|--------------------|---|---|---|
| 0.2504812480412250 | 0.6240501946682511 | 0.2266606023106269 | T | T | T |
| 0.7505414422279568 | 0.6244345445519137 | 0.2269442323786376 | T | T | T |
| 0.0016685405340574 | 0.8744385086857078 | 0.2370312260342174 | T | T | T |
| 0.5022693463618042 | 0.8741266050423533 | 0.2368268084337838 | T | T | T |
| 0.2491567384583105 | 0.8723630227158427 | 0.2360481719174950 | T | T | T |
| 0.7506255060402263 | 0.8742057183968683 | 0.2366870744303247 | T | T | T |
| 0.2422667576414913 | 0.0026809444234756 | 0.2936015909851878 | T | T | T |
| 0.7445451590692924 | 0.0043257048775223 | 0.2952267159935669 | T | T | T |
| 0.0106415668160849 | 0.0047028072374959 | 0.2960622810499044 | T | T | T |
| 0.5140531484859162 | 0.0000931959598431 | 0.3002437573924797 | T | T | T |
| 0.5137749915605028 | 0.2547972620100541 | 0.2949422222077870 | T | T | T |
| 0.9972034742352347 | 0.2432984224853217 | 0.2946985863403052 | T | T | T |
| 0.2626615362356318 | 0.2430440870382694 | 0.2934504415406541 | T | T | T |
| 0.7600577118993739 | 0.2419004243699643 | 0.2969220726019149 | T | T | T |
| 0.4939614388849499 | 0.5061889992789829 | 0.2951049868034373 | T | T | T |
| 0.9930925312704515 | 0.5051125509363099 | 0.2962225834178123 | T | T | T |
| 0.2597310681083055 | 0.5049542334253406 | 0.2966953341879708 | T | T | T |
| 0.7595648854076973 | 0.5047602291080232 | 0.2966954746116647 | T | T | T |
| 0.0085952985902093 | 0.7438123749905950 | 0.2961795649031329 | T | T | T |
| 0.5089629356981805 | 0.7438829654213185 | 0.2961972123925406 | T | T | T |
| 0.2423061737619470 | 0.7431458600814488 | 0.2964758098763903 | T | T | T |
| 0.7424248648933676 | 0.7441029921647753 | 0.2963913521676209 | T | T | T |
| 0.1283489383572278 | 0.0383022633726251 | 0.3646003857563343 | T | T | T |
| 0.6324300869909291 | 0.0348209273448957 | 0.3670436141853783 | T | T | T |
| 0.3782023715866971 | 0.0508001210522630 | 0.3280192175834105 | T | T | T |
| 0.8775319205240985 | 0.0611472784587381 | 0.3295449653931627 | T | T | T |
| 0.1313019930638294 | 0.1847974322465832 | 0.3287549443881447 | T | T | T |
| 0.6362788044658151 | 0.1906264749764283 | 0.3495220496817721 | T | T | T |
| 0.3750350522574075 | 0.1987317768428554 | 0.3624487848495312 | T | T | T |
| 0.8802074717402274 | 0.2074177019600055 | 0.3623219279209191 | T | T | T |
| 0.3773974425332199 | 0.5393893896650139 | 0.3647118543475713 | T | T | T |
| 0.8764149907892518 | 0.5402325925198064 | 0.3651273001309133 | T | T | T |
| 0.1262902359125815 | 0.5616054162898083 | 0.3307918398959330 | T | T | T |
| 0.6268276746034507 | 0.5622593655392468 | 0.3306527909878008 | T | T | T |
| 0.3758705961683625 | 0.6870124235162786 | 0.3306747989633287 | T | T | T |
| 0.8754839417414619 | 0.6873519197400360 | 0.3308726745480226 | T | T | T |
| 0.1253371065256960 | 0.7085926341108030 | 0.3650009307253695 | T | T | T |
| 0.6255713421923926 | 0.7093729179934375 | 0.3652035778665504 | T | T | T |
| 0.0000000000000000 | 0.1711556451068148 | 0.0044115880985913 | F | F | F |
| 0.5000000070939734 | 0.1711556451068148 | 0.0044115880985913 | F | F | F |
| 0.0000000000000000 | 0.3288443868160940 | 0.0044115880985913 | F | F | F |
| 0.5000000070939734 | 0.3288443868160940 | 0.0044115880985913 | F | F | F |
| 0.0000000000000000 | 0.4211558529957315 | 0.0044115880985913 | F | F | F |
| 0.5000000070939734 | 0.4211558529957315 | 0.0044115880985913 | F | F | F |
| 0.0000000000000000 | 0.0788441789271772 | 0.0044115880985913 | F | F | F |
| 0.5000000070939734 | 0.0788441789271772 | 0.0044115880985913 | F | F | F |
| 0.2500002078888954 | 0.0788441789271772 | 0.0044115880985913 | F | F | F |
| 0.7500002149828688 | 0.0788441789271772 | 0.0044115880985913 | F | F | F |
| 0.2500002078888954 | 0.1711556451068148 | 0.0044115880985913 | F | F | F |
| 0.7500002149828688 | 0.1711556451068148 | 0.0044115880985913 | F | F | F |
| 0.2500002078888954 | 0.3288443868160940 | 0.0044115880985913 | F | F | F |
| 0.7500002149828688 | 0.3288443868160940 | 0.0044115880985913 | F | F | F |
| 0.2500002078888954 | 0.4211558529957315 | 0.0044115880985913 | F | F | F |
| 0.7500002149828688 | 0.4211558529957315 | 0.0044115880985913 | F | F | F |
| 0.0000000000000000 | 0.6711556770297236 | 0.0044115880985913 | F | F | F |
| 0.5000000070939734 | 0.6711556770297236 | 0.0044115880985913 | F | F | F |
| 0.0000000000000000 | 0.8288444187389956 | 0.0044115880985913 | F | F | F |



|                    |                    |                    |   |   |   |
|--------------------|--------------------|--------------------|---|---|---|
| 0.5000000070939734 | 0.8288444187389956 | 0.0044115880985913 | F | F | F |
| 0.0000000000000000 | 0.9211558849186403 | 0.0044115880985913 | F | F | F |
| 0.5000000070939734 | 0.9211558849186403 | 0.0044115880985913 | F | F | F |
| 0.0000000000000000 | 0.5788442108500789 | 0.0044115880985913 | F | F | F |
| 0.5000000070939734 | 0.5788442108500789 | 0.0044115880985913 | F | F | F |
| 0.2500002078888954 | 0.5788442108500789 | 0.0044115880985913 | F | F | F |
| 0.7500002149828688 | 0.5788442108500789 | 0.0044115880985913 | F | F | F |
| 0.2500002078888954 | 0.6711556770297236 | 0.0044115880985913 | F | F | F |
| 0.7500002149828688 | 0.6711556770297236 | 0.0044115880985913 | F | F | F |
| 0.2500002078888954 | 0.8288444187389956 | 0.0044115880985913 | F | F | F |
| 0.7500002149828688 | 0.8288444187389956 | 0.0044115880985913 | F | F | F |
| 0.2500002078888954 | 0.9211558849186403 | 0.0044115880985913 | F | F | F |
| 0.7500002149828688 | 0.9211558849186403 | 0.0044115880985913 | F | F | F |
| 0.5948694350231909 | 0.2674467380771594 | 0.4592604030337912 | T | T | T |
| 0.4629687375796962 | 0.3384315369935382 | 0.3993097109342664 | T | T | T |
| 0.5805034270003926 | 0.2565607991604557 | 0.4103822414680550 | T | T | T |
| 0.5088607388794395 | 0.2897345347648079 | 0.3810635174714335 | T | T | T |

Ethylene pi complex starting rotamer: E(PBE-D3) = -660.00949 eV, E(HSE06-D3) = -763.08529 eV

|                     |                     |                     |
|---------------------|---------------------|---------------------|
| 1.0000000000000000  |                     |                     |
| 15.3244190216000007 | 0.0000000000000000  | 0.0000000000000000  |
| 0.0000000000000000  | 15.3244190216000007 | 0.0000000000000000  |
| 0.0000000000000000  | 0.0000000000000000  | 21.6720008849999992 |

Si H C

96 36 2

Selective dynamics

Direct

|                    |                    |                    |   |   |   |
|--------------------|--------------------|--------------------|---|---|---|
| 0.0000000000000000 | 0.0000000000000000 | 0.0438344616013850 | F | F | F |
| 0.5000000000000000 | 0.0000000000000000 | 0.0438344616013850 | F | F | F |
| 0.0000000000000000 | 0.2500001695033731 | 0.0438344616013850 | F | F | F |
| 0.5000000000000000 | 0.2500001695033731 | 0.0438344616013850 | F | F | F |
| 0.2500001695034015 | 0.0000000000000000 | 0.0438344616013850 | F | F | F |
| 0.7500001695034015 | 0.0000000000000000 | 0.0438344616013850 | F | F | F |
| 0.0000000000000000 | 0.5000000319229088 | 0.0438344616013850 | F | F | F |
| 0.5000000000000000 | 0.5000000319229088 | 0.0438344616013850 | F | F | F |
| 0.2500001695034015 | 0.2500001695033731 | 0.0438344616013850 | F | F | F |
| 0.7500001695034015 | 0.2500001695033731 | 0.0438344616013850 | F | F | F |
| 0.0000000000000000 | 0.7500002014262819 | 0.0438344616013850 | F | F | F |
| 0.5000000000000000 | 0.7500002014262819 | 0.0438344616013850 | F | F | F |
| 0.2500001695034015 | 0.5000000319229088 | 0.0438344616013850 | F | F | F |
| 0.7500001695034015 | 0.5000000319229088 | 0.0438344616013850 | F | F | F |
| 0.2500001695034015 | 0.7500002014262819 | 0.0438344616013850 | F | F | F |
| 0.7500001695034015 | 0.7500002014262819 | 0.0438344616013850 | F | F | F |
| 0.1249999139362856 | 0.0000000000000000 | 0.1063344564968744 | F | F | F |
| 0.6249999139362927 | 0.0000000000000000 | 0.1063344564968744 | F | F | F |
| 0.1249999139362856 | 0.2500001695033731 | 0.1063344564968744 | F | F | F |
| 0.6249999139362927 | 0.2500001695033731 | 0.1063344564968744 | F | F | F |
| 0.3750000834396943 | 0.0000000000000000 | 0.1063344564968744 | F | F | F |
| 0.8750000834396942 | 0.0000000000000000 | 0.1063344564968744 | F | F | F |
| 0.1249999139362856 | 0.5000000319229088 | 0.1063344564968744 | F | F | F |
| 0.6249999139362927 | 0.5000000319229088 | 0.1063344564968744 | F | F | F |
| 0.3750000834396943 | 0.2500001695033731 | 0.1063344564968744 | F | F | F |
| 0.8750000834396942 | 0.2500001695033731 | 0.1063344564968744 | F | F | F |
| 0.1249999139362856 | 0.7500002014262819 | 0.1063344564968744 | F | F | F |
| 0.6249999139362927 | 0.7500002014262819 | 0.1063344564968744 | F | F | F |
| 0.3750000834396943 | 0.5000000319229088 | 0.1063344564968744 | F | F | F |

|                    |                    |                    |   |   |   |
|--------------------|--------------------|--------------------|---|---|---|
| 0.8750000834396942 | 0.5000000319229088 | 0.1063344564968744 | F | F | F |
| 0.3750000834396943 | 0.7500002014262819 | 0.1063344564968744 | F | F | F |
| 0.8750000834396942 | 0.7500002014262819 | 0.1063344564968744 | F | F | F |
| 0.1250203850415299 | 0.1244449447334158 | 0.1657834148871227 | T | T | T |
| 0.6250386735447839 | 0.1243971787424865 | 0.1657880700153433 | T | T | T |
| 0.3755550629823317 | 0.1254381176572496 | 0.1662417690850492 | T | T | T |
| 0.8745050237325038 | 0.1254298010902979 | 0.1662393468240578 | T | T | T |
| 0.3750267302638574 | 0.3749557776973405 | 0.1715319620722285 | T | T | T |
| 0.8749922160864051 | 0.3749671130206654 | 0.1715180168309974 | T | T | T |
| 0.1250031820309584 | 0.3751222031732395 | 0.1726754028266825 | T | T | T |
| 0.6249968703761192 | 0.3751902962390387 | 0.1726843969110325 | T | T | T |
| 0.3749942283885082 | 0.6243977317884259 | 0.1659202240257387 | T | T | T |
| 0.8750092272133360 | 0.6243993980636782 | 0.1659184760503515 | T | T | T |
| 0.1250031247328795 | 0.6256145798268257 | 0.1660020059834119 | T | T | T |
| 0.6250062459031624 | 0.6256095615477677 | 0.1659633684295142 | T | T | T |
| 0.1249911686904755 | 0.8749972577278282 | 0.1715559930159128 | T | T | T |
| 0.6250033064428995 | 0.8750276787208943 | 0.1715976959708181 | T | T | T |
| 0.3751472826134792 | 0.8750799900713337 | 0.1729024014799528 | T | T | T |
| 0.8748215326260306 | 0.8750874917354124 | 0.1729165894078042 | T | T | T |
| 0.0001141857771632 | 0.1249313733566441 | 0.2263831785691816 | T | T | T |
| 0.5006467237589730 | 0.1245503435430230 | 0.2268061578973468 | T | T | T |
| 0.2499422210736087 | 0.1249304939648505 | 0.2263780488526612 | T | T | T |
| 0.7494374504007216 | 0.1246103205239091 | 0.2268027772211569 | T | T | T |
| 0.4993302703643275 | 0.3751353798645082 | 0.2372972826521465 | T | T | T |
| 0.9991572871821613 | 0.3752888543753006 | 0.2371376391647847 | T | T | T |
| 0.2508488296091738 | 0.3752907598077506 | 0.2371427189499691 | T | T | T |
| 0.7506899303884356 | 0.3751797798104244 | 0.2372562790122932 | T | T | T |
| 0.4999771988336463 | 0.6252349506643580 | 0.2266770087537841 | T | T | T |
| 0.9999389168111344 | 0.6251002370009898 | 0.2267109865701565 | T | T | T |
| 0.2500639807152922 | 0.6250967268870129 | 0.2267109829532204 | T | T | T |
| 0.7500334544605964 | 0.6252639687948982 | 0.2266816406949543 | T | T | T |
| 0.0009236369495505 | 0.8752612230759503 | 0.2373286259034980 | T | T | T |
| 0.5010227058111726 | 0.8758103139477040 | 0.2374864243372032 | T | T | T |
| 0.2490531013693913 | 0.8752507005066124 | 0.2373252537839494 | T | T | T |
| 0.7489422579126270 | 0.8758751578906284 | 0.2375277269735553 | T | T | T |
| 0.2418133578858417 | 0.0060116038307756 | 0.2963742054913210 | T | T | T |
| 0.7403832099810411 | 0.0062009398144879 | 0.2971979249016599 | T | T | T |
| 0.0080967567623653 | 0.0060286939652203 | 0.2963763062579980 | T | T | T |
| 0.5094920628403131 | 0.0061153750082202 | 0.2971350316883449 | T | T | T |
| 0.4929270021390235 | 0.2429927743149779 | 0.2944606026520069 | T | T | T |
| 0.9923442956525277 | 0.2445561294501351 | 0.2958241159676005 | T | T | T |
| 0.2576394617058003 | 0.2445500603544174 | 0.2958226419595761 | T | T | T |
| 0.7570467323477876 | 0.2430831748990156 | 0.2944133062689174 | T | T | T |
| 0.4917834012182249 | 0.5057816838293101 | 0.2964253707139072 | T | T | T |
| 0.9917853267328385 | 0.5057352941838266 | 0.2964300705637264 | T | T | T |
| 0.2582048931663212 | 0.5057343601099472 | 0.2964342424761808 | T | T | T |
| 0.7582137343303134 | 0.5057948123309199 | 0.2964134915589127 | T | T | T |
| 0.0080465102029712 | 0.7445183314644790 | 0.296417627271853  | T | T | T |
| 0.5080653101741902 | 0.7447556452861798 | 0.2963590207244703 | T | T | T |
| 0.2419315512943148 | 0.7445135368002732 | 0.2964244994620328 | T | T | T |
| 0.7419165006349832 | 0.7447868715435340 | 0.2963689132155966 | T | T | T |
| 0.1249635287832681 | 0.0408335950264673 | 0.3650451688362436 | T | T | T |
| 0.6248691326201461 | 0.0402225897358454 | 0.3676405477588593 | T | T | T |
| 0.3755748346061833 | 0.0621935534206719 | 0.3299560792403808 | T | T | T |
| 0.8743364961348469 | 0.0622745573959532 | 0.3299856595404869 | T | T | T |
| 0.1249833729832965 | 0.1877051797910552 | 0.3309395488022328 | T | T | T |
| 0.6251338557881398 | 0.1940956518121121 | 0.3420957495312466 | T | T | T |

|                    |                    |                    |   |   |   |
|--------------------|--------------------|--------------------|---|---|---|
| 0.3753134406884943 | 0.2091805723676900 | 0.3625804317388735 | T | T | T |
| 0.8746327143666902 | 0.2092704058846846 | 0.3625763609832789 | T | T | T |
| 0.3749926417664367 | 0.5406352727217585 | 0.3652296598433981 | T | T | T |
| 0.8749957045742343 | 0.5406429362544938 | 0.3652234696421168 | T | T | T |
| 0.1249926470932593 | 0.5623103043191356 | 0.3308382368990430 | T | T | T |
| 0.6250001213360209 | 0.5626547467557861 | 0.3307313809311170 | T | T | T |
| 0.3750668227935339 | 0.6878728011837300 | 0.3309749975709896 | T | T | T |
| 0.8749090289106599 | 0.6878817929017697 | 0.3309759076756013 | T | T | T |
| 0.1249869290216475 | 0.7092826069964968 | 0.3649429444232537 | T | T | T |
| 0.6249905906202289 | 0.7095407604177626 | 0.3648872783050080 | T | T | T |
| 0.0000000000000000 | 0.1711556604610038 | 0.0044115607758073 | F | F | F |
| 0.5000000000000000 | 0.1711556604610038 | 0.0044115607758073 | F | F | F |
| 0.0000000000000000 | 0.3288443714619048 | 0.0044115607758073 | F | F | F |
| 0.5000000000000000 | 0.3288443714619048 | 0.0044115607758073 | F | F | F |
| 0.0000000000000000 | 0.4211558299644409 | 0.0044115607758073 | F | F | F |
| 0.5000000000000000 | 0.4211558299644409 | 0.0044115607758073 | F | F | F |
| 0.0000000000000000 | 0.0788442019584679 | 0.0044115607758073 | F | F | F |
| 0.5000000000000000 | 0.0788442019584679 | 0.0044115607758073 | F | F | F |
| 0.2500001695034015 | 0.0788442019584679 | 0.0044115607758073 | F | F | F |
| 0.7500001695034015 | 0.0788442019584679 | 0.0044115607758073 | F | F | F |
| 0.2500001695034015 | 0.1711556604610038 | 0.0044115607758073 | F | F | F |
| 0.7500001695034015 | 0.1711556604610038 | 0.0044115607758073 | F | F | F |
| 0.2500001695034015 | 0.3288443714619048 | 0.0044115607758073 | F | F | F |
| 0.7500001695034015 | 0.3288443714619048 | 0.0044115607758073 | F | F | F |
| 0.2500001695034015 | 0.4211558299644409 | 0.0044115607758073 | F | F | F |
| 0.7500001695034015 | 0.4211558299644409 | 0.0044115607758073 | F | F | F |
| 0.0000000000000000 | 0.6711556923839126 | 0.0044115607758073 | F | F | F |
| 0.5000000000000000 | 0.6711556923839126 | 0.0044115607758073 | F | F | F |
| 0.0000000000000000 | 0.8288444033848066 | 0.0044115607758073 | F | F | F |
| 0.5000000000000000 | 0.8288444033848066 | 0.0044115607758073 | F | F | F |
| 0.0000000000000000 | 0.9211558618873497 | 0.0044115607758073 | F | F | F |
| 0.5000000000000000 | 0.9211558618873497 | 0.0044115607758073 | F | F | F |
| 0.0000000000000000 | 0.5788442338813695 | 0.0044115607758073 | F | F | F |
| 0.5000000000000000 | 0.5788442338813695 | 0.0044115607758073 | F | F | F |
| 0.2500001695034015 | 0.5788442338813695 | 0.0044115607758073 | F | F | F |
| 0.7500001695034015 | 0.5788442338813695 | 0.0044115607758073 | F | F | F |
| 0.2500001695034015 | 0.6711556923839126 | 0.0044115607758073 | F | F | F |
| 0.7500001695034015 | 0.6711556923839126 | 0.0044115607758073 | F | F | F |
| 0.2500001695034015 | 0.8288444033848066 | 0.0044115607758073 | F | F | F |
| 0.7500001695034015 | 0.8288444033848066 | 0.0044115607758073 | F | F | F |
| 0.2500001695034015 | 0.9211558618873497 | 0.0044115607758073 | F | F | F |
| 0.7500001695034015 | 0.9211558618873497 | 0.0044115607758073 | F | F | F |
| 0.7057735197705570 | 0.2034413965512052 | 0.4487031039681164 | T | T | T |
| 0.5408297639578326 | 0.2067215698026896 | 0.4471788361909456 | T | T | T |
| 0.7081614275696660 | 0.3162530659814012 | 0.4176824972500174 | T | T | T |
| 0.5441466715978752 | 0.3194427993793918 | 0.4160991552901577 | T | T | T |
| 0.6698332544854314 | 0.2584123658001449 | 0.4289972823172469 | T | T | T |
| 0.5797185904949412 | 0.2601341152164178 | 0.4281217952915836 | T | T | T |

Ethylene pi complex minimum rotamer: E(PBE-D3) = -660.04322 eV, E(HSE06-D3) = -763.1027 eV

1.0000000000000000

15.3244190216000007 0.0000000000000000 0.0000000000000000

0.0000000000000000 15.3244190216000007 0.0000000000000000

0.0000000000000000 0.0000000000000000 21.6720008849999992

Si H C

96 36 2

# Selective dynamics

## Direct

|                    |                    |                    |       |
|--------------------|--------------------|--------------------|-------|
| 0.0000000000000000 | 0.0000000000000000 | 0.0438344616013850 | F F F |
| 0.5000000000000000 | 0.0000000000000000 | 0.0438344616013850 | F F F |
| 0.0000000000000000 | 0.2500001695033731 | 0.0438344616013850 | F F F |
| 0.5000000000000000 | 0.2500001695033731 | 0.0438344616013850 | F F F |
| 0.2500001695034015 | 0.0000000000000000 | 0.0438344616013850 | F F F |
| 0.7500001695034015 | 0.0000000000000000 | 0.0438344616013850 | F F F |
| 0.0000000000000000 | 0.5000000319229088 | 0.0438344616013850 | F F F |
| 0.5000000000000000 | 0.5000000319229088 | 0.0438344616013850 | F F F |
| 0.2500001695034015 | 0.2500001695033731 | 0.0438344616013850 | F F F |
| 0.7500001695034015 | 0.2500001695033731 | 0.0438344616013850 | F F F |
| 0.0000000000000000 | 0.7500002014262819 | 0.0438344616013850 | F F F |
| 0.5000000000000000 | 0.7500002014262819 | 0.0438344616013850 | F F F |
| 0.2500001695034015 | 0.5000000319229088 | 0.0438344616013850 | F F F |
| 0.7500001695034015 | 0.5000000319229088 | 0.0438344616013850 | F F F |
| 0.2500001695034015 | 0.7500002014262819 | 0.0438344616013850 | F F F |
| 0.7500001695034015 | 0.7500002014262819 | 0.0438344616013850 | F F F |
| 0.1249999139362856 | 0.0000000000000000 | 0.1063344564968744 | F F F |
| 0.6249999139362927 | 0.0000000000000000 | 0.1063344564968744 | F F F |
| 0.1249999139362856 | 0.2500001695033731 | 0.1063344564968744 | F F F |
| 0.6249999139362927 | 0.2500001695033731 | 0.1063344564968744 | F F F |
| 0.3750000834396943 | 0.0000000000000000 | 0.1063344564968744 | F F F |
| 0.8750000834396942 | 0.0000000000000000 | 0.1063344564968744 | F F F |
| 0.1249999139362856 | 0.5000000319229088 | 0.1063344564968744 | F F F |
| 0.6249999139362927 | 0.5000000319229088 | 0.1063344564968744 | F F F |
| 0.3750000834396943 | 0.2500001695033731 | 0.1063344564968744 | F F F |
| 0.8750000834396942 | 0.2500001695033731 | 0.1063344564968744 | F F F |
| 0.1249999139362856 | 0.7500002014262819 | 0.1063344564968744 | F F F |
| 0.6249999139362927 | 0.7500002014262819 | 0.1063344564968744 | F F F |
| 0.3750000834396943 | 0.5000000319229088 | 0.1063344564968744 | F F F |
| 0.8750000834396942 | 0.5000000319229088 | 0.1063344564968744 | F F F |
| 0.3750000834396943 | 0.7500002014262819 | 0.1063344564968744 | F F F |
| 0.8750000834396942 | 0.7500002014262819 | 0.1063344564968744 | F F F |
| 0.1253062458061499 | 0.1244762194783450 | 0.1660862554691410 | T T T |
| 0.6256576865891683 | 0.1244478228070612 | 0.1656323813310824 | T T T |
| 0.3755315554000208 | 0.1253784305624478 | 0.1660562522998101 | T T T |
| 0.8749530517449021 | 0.1252693426773984 | 0.1661033412854108 | T T T |
| 0.3752636578446279 | 0.3748259847705429 | 0.1717637315805712 | T T T |
| 0.8750743772225159 | 0.3750926284217602 | 0.1714583367030071 | T T T |
| 0.1251065453395438 | 0.3750144035382327 | 0.1728005892111847 | T T T |
| 0.6249330727610405 | 0.3751426361428207 | 0.1727870488417692 | T T T |
| 0.3749101023630881 | 0.6243919335519159 | 0.1659293246892611 | T T T |
| 0.8748916672230769 | 0.6244202004461644 | 0.1659315954759821 | T T T |
| 0.1249312062026288 | 0.6256076353579285 | 0.1659763039870562 | T T T |
| 0.6249218649597333 | 0.6256090704833884 | 0.1659584270417376 | T T T |
| 0.1246844254801634 | 0.8750434557184624 | 0.1716003200199364 | T T T |
| 0.6248804998912241 | 0.8750989931009353 | 0.1715748948221948 | T T T |
| 0.3747588531652825 | 0.8750479557086650 | 0.1727826096265784 | T T T |
| 0.8744567541572824 | 0.8752237508665167 | 0.1730269549863761 | T T T |
| 0.0001789798561187 | 0.1252206723725046 | 0.2266605232631511 | T T T |
| 0.5008933260703154 | 0.1243573098772414 | 0.2259772446104400 | T T T |
| 0.2503879392432212 | 0.1250878584766264 | 0.2268000504461710 | T T T |
| 0.7501383112530036 | 0.1257151206666885 | 0.2264626333110016 | T T T |
| 0.4994659835538044 | 0.3741781470353330 | 0.2378124914534346 | T T T |
| 0.9991556612061950 | 0.3752184026838549 | 0.2372068166859657 | T T T |
| 0.2510213249346308 | 0.3749796102174752 | 0.2374110573335545 | T T T |

0.7509193660759820 0.3752385602414410 0.2370331407482239 T T T  
0.4998906957286019 0.6249717080047692 0.2266588842562663 T T T  
0.9998655487102900 0.6251953011525327 0.2266779682872403 T T T  
0.2499579143952080 0.6249904763309287 0.2267107644797952 T T T  
0.7498839813961029 0.6255967930449106 0.2267351014701790 T T T  
0.0005252949412857 0.8754086110942431 0.2373997464219768 T T T  
0.5006385251864590 0.8754281497467070 0.2371044478596348 T T T  
0.2487417142811682 0.8751663162318136 0.2373624323236742 T T T  
0.7484440658096002 0.8766078379432659 0.2378258846966415 T T T  
0.2410151564617717 0.0057121717595645 0.2967084516490240 T T T  
0.7391605025190692 0.0077245736415727 0.2973963203783803 T T T  
0.0068080316166309 0.0062527663607239 0.2964783168889594 T T T  
0.5080142057549241 0.0063772175778676 0.2960740759052528 T T T  
0.4929369633048672 0.2411619453537461 0.2948013913155249 T T T  
0.9921851729523318 0.2447474572483993 0.2962849335247111 T T T  
0.2584217541064897 0.2444771767484812 0.2966337842280902 T T T  
0.7566214302430022 0.2435584889193773 0.2943014822815136 T T T  
0.4918479963749379 0.5054853890889659 0.2964664573041472 T T T  
0.9917664272721928 0.5058067667132029 0.2963455604439267 T T T  
0.2581773416531482 0.5056517802331740 0.2964921603518647 T T T  
0.7581650575745926 0.5058556326411260 0.2963457830035285 T T T  
0.0078246816054955 0.7445924538171356 0.2963696216209344 T T T  
0.5077571353508837 0.7446158334802773 0.2962490048300688 T T T  
0.2416247901187319 0.7444047913224715 0.2964544299019222 T T T  
0.7416418734656260 0.7452188214275337 0.2964583428096857 T T T  
0.1239881079820195 0.0410716587794458 0.3648647395017449 T T T  
0.6222663645580486 0.0391445846135685 0.3683523352495557 T T T  
0.3745826586352028 0.0619235232937254 0.3301243219756022 T T T  
0.8732482395161938 0.0631720233272720 0.3304887850297759 T T T  
0.1251133446016493 0.1879133070181818 0.3310962022626374 T T T  
0.6269068264341400 0.1970901202538194 0.3425800043799644 T T T  
0.3761567147856345 0.2086445221804773 0.3638539365532345 T T T  
0.8738438136400709 0.2102671092539905 0.3630533617086925 T T T  
0.3750231982642090 0.5405998357044617 0.3652067498158140 T T T  
0.8749183492824217 0.5408633067643822 0.3650789633799419 T T T  
0.1249370693890406 0.5623134728091337 0.3308530222136133 T T T  
0.6249690481267554 0.5628532183806743 0.3306978891328997 T T T  
0.3747826988580101 0.6877866225653988 0.3309522908944422 T T T  
0.8746452995103868 0.6880633385141058 0.3309205523762813 T T T  
0.1247009540726471 0.7093214365712885 0.3649996326809424 T T T  
0.6246834788310609 0.7097431354724605 0.3648729837710919 T T T  
0.0000000000000000 0.1711556604610038 0.0044115607758073 F F F  
0.5000000000000000 0.1711556604610038 0.0044115607758073 F F F  
0.0000000000000000 0.3288443714619048 0.0044115607758073 F F F  
0.5000000000000000 0.3288443714619048 0.0044115607758073 F F F  
0.0000000000000000 0.4211558299644409 0.0044115607758073 F F F  
0.5000000000000000 0.4211558299644409 0.0044115607758073 F F F  
0.0000000000000000 0.0788442019584679 0.0044115607758073 F F F  
0.5000000000000000 0.0788442019584679 0.0044115607758073 F F F  
0.2500001695034015 0.0788442019584679 0.0044115607758073 F F F  
0.7500001695034015 0.0788442019584679 0.0044115607758073 F F F  
0.2500001695034015 0.1711556604610038 0.0044115607758073 F F F  
0.7500001695034015 0.1711556604610038 0.0044115607758073 F F F  
0.2500001695034015 0.3288443714619048 0.0044115607758073 F F F  
0.7500001695034015 0.3288443714619048 0.0044115607758073 F F F  
0.2500001695034015 0.4211558299644409 0.0044115607758073 F F F  
0.7500001695034015 0.4211558299644409 0.0044115607758073 F F F

|                    |                    |                    |       |
|--------------------|--------------------|--------------------|-------|
| 0.0000000000000000 | 0.6711556923839126 | 0.0044115607758073 | F F F |
| 0.5000000000000000 | 0.6711556923839126 | 0.0044115607758073 | F F F |
| 0.0000000000000000 | 0.8288444033848066 | 0.0044115607758073 | F F F |
| 0.5000000000000000 | 0.8288444033848066 | 0.0044115607758073 | F F F |
| 0.0000000000000000 | 0.9211558618873495 | 0.0044115607758073 | F F F |
| 0.5000000000000000 | 0.9211558618873495 | 0.0044115607758073 | F F F |
| 0.0000000000000000 | 0.5788442338813695 | 0.0044115607758073 | F F F |
| 0.5000000000000000 | 0.5788442338813695 | 0.0044115607758073 | F F F |
| 0.2500001695034015 | 0.5788442338813695 | 0.0044115607758073 | F F F |
| 0.7500001695034015 | 0.5788442338813695 | 0.0044115607758073 | F F F |
| 0.2500001695034015 | 0.6711556923839126 | 0.0044115607758073 | F F F |
| 0.7500001695034015 | 0.6711556923839126 | 0.0044115607758073 | F F F |
| 0.2500001695034015 | 0.8288444033848066 | 0.0044115607758073 | F F F |
| 0.7500001695034015 | 0.8288444033848066 | 0.0044115607758073 | F F F |
| 0.2500001695034015 | 0.9211558618873495 | 0.0044115607758073 | F F F |
| 0.7500001695034015 | 0.9211558618873495 | 0.0044115607758073 | F F F |
| 0.6169556051454086 | 0.1837268893381068 | 0.4671402759557181 | T T T |
| 0.5255701173145310 | 0.3017786981354900 | 0.4204036019045159 | T T T |
| 0.7182132899092851 | 0.2390712997379205 | 0.4397585143496763 | T T T |
| 0.6259744443504718 | 0.3570814967298076 | 0.3913475847061352 | T T T |
| 0.6468321879340192 | 0.2343963910870428 | 0.4387819476062640 | T T T |
| 0.5961301222829493 | 0.2998797782720393 | 0.4129142684956868 | T T T |

Ethylene TS pi complex -> sublayer: E(PBE-D3) = -659.86181 eV, E(HSE06-D3) = -762.89265 eV

|                     |                     |                     |
|---------------------|---------------------|---------------------|
| 1.0000000000000000  |                     |                     |
| 15.3244190216000007 | 0.0000000000000000  | 0.0000000000000000  |
| 0.0000000000000000  | 15.3244190216000007 | 0.0000000000000000  |
| 0.0000000000000000  | 0.0000000000000000  | 21.6720008849999992 |

Si H C

96 36 2

Selective dynamics

Direct

|                    |                    |                    |       |
|--------------------|--------------------|--------------------|-------|
| 0.0000000000000000 | 0.0000000000000000 | 0.0438344616013850 | F F F |
| 0.5000000000000000 | 0.0000000000000000 | 0.0438344616013850 | F F F |
| 0.0000000000000000 | 0.2500001695033731 | 0.0438344616013850 | F F F |
| 0.5000000000000000 | 0.2500001695033731 | 0.0438344616013850 | F F F |
| 0.2500001695034015 | 0.0000000000000000 | 0.0438344616013850 | F F F |
| 0.7500001695034015 | 0.0000000000000000 | 0.0438344616013850 | F F F |
| 0.0000000000000000 | 0.5000000319229088 | 0.0438344616013850 | F F F |
| 0.5000000000000000 | 0.5000000319229088 | 0.0438344616013850 | F F F |
| 0.2500001695034015 | 0.2500001695033731 | 0.0438344616013850 | F F F |
| 0.7500001695034015 | 0.2500001695033731 | 0.0438344616013850 | F F F |
| 0.0000000000000000 | 0.7500002014262819 | 0.0438344616013850 | F F F |
| 0.5000000000000000 | 0.7500002014262819 | 0.0438344616013850 | F F F |
| 0.2500001695034015 | 0.5000000319229088 | 0.0438344616013850 | F F F |
| 0.7500001695034015 | 0.5000000319229088 | 0.0438344616013850 | F F F |
| 0.2500001695034015 | 0.7500002014262819 | 0.0438344616013850 | F F F |
| 0.7500001695034015 | 0.7500002014262819 | 0.0438344616013850 | F F F |
| 0.1249999139362856 | 0.0000000000000000 | 0.1063344564968744 | F F F |
| 0.6249999139362927 | 0.0000000000000000 | 0.1063344564968744 | F F F |
| 0.1249999139362856 | 0.2500001695033731 | 0.1063344564968744 | F F F |
| 0.6249999139362927 | 0.2500001695033731 | 0.1063344564968744 | F F F |
| 0.3750000834396943 | 0.0000000000000000 | 0.1063344564968744 | F F F |
| 0.8750000834396942 | 0.0000000000000000 | 0.1063344564968744 | F F F |
| 0.1249999139362856 | 0.5000000319229088 | 0.1063344564968744 | F F F |
| 0.6249999139362927 | 0.5000000319229088 | 0.1063344564968744 | F F F |

|                    |                    |                    |   |   |   |
|--------------------|--------------------|--------------------|---|---|---|
| 0.3750000834396943 | 0.2500001695033731 | 0.1063344564968744 | F | F | F |
| 0.8750000834396942 | 0.2500001695033731 | 0.1063344564968744 | F | F | F |
| 0.1249999139362856 | 0.7500002014262819 | 0.1063344564968744 | F | F | F |
| 0.6249999139362927 | 0.7500002014262819 | 0.1063344564968744 | F | F | F |
| 0.3750000834396943 | 0.5000000319229088 | 0.1063344564968744 | F | F | F |
| 0.8750000834396942 | 0.5000000319229088 | 0.1063344564968744 | F | F | F |
| 0.3750000834396943 | 0.7500002014262819 | 0.1063344564968744 | F | F | F |
| 0.8750000834396942 | 0.7500002014262819 | 0.1063344564968744 | F | F | F |
| 0.1263273739482406 | 0.1243966507575915 | 0.1658887535952898 | T | T | T |
| 0.6261678828245267 | 0.1246884153093835 | 0.1658519346749228 | T | T | T |
| 0.3785767018058230 | 0.1260864727357516 | 0.1671603316824312 | T | T | T |
| 0.8766140183790471 | 0.1250699356001225 | 0.1659348921115544 | T | T | T |
| 0.3739859713844780 | 0.3748355957965017 | 0.1712465652933144 | T | T | T |
| 0.8745178236485243 | 0.3749862174065705 | 0.1715783997423607 | T | T | T |
| 0.1245264913806801 | 0.3749876511626180 | 0.1728536114250329 | T | T | T |
| 0.6243279350928718 | 0.3750905648296763 | 0.1727471854455787 | T | T | T |
| 0.3744983254047361 | 0.6244484670073318 | 0.1658163929833026 | T | T | T |
| 0.8747807484989655 | 0.6243700227310424 | 0.1659550797029297 | T | T | T |
| 0.1247645130801920 | 0.6256008393336573 | 0.1659925437666850 | T | T | T |
| 0.6250212698701451 | 0.6256130693099872 | 0.1658701642660849 | T | T | T |
| 0.1246949613634236 | 0.8749336500793601 | 0.1714893335249195 | T | T | T |
| 0.6250502654833247 | 0.8749936697207269 | 0.1714386981494267 | T | T | T |
| 0.3747033261233801 | 0.8749739392997232 | 0.1726481910738088 | T | T | T |
| 0.8747668469351534 | 0.8750799320464001 | 0.1728854287431579 | T | T | T |
| 0.0015542891158885 | 0.1247365180422829 | 0.2268375784685072 | T | T | T |
| 0.5041554303480902 | 0.1268630162824951 | 0.2292484917577662 | T | T | T |
| 0.2517413688421526 | 0.1248703043318887 | 0.2262077681903820 | T | T | T |
| 0.7514896482859547 | 0.1246411493214426 | 0.2254012169210281 | T | T | T |
| 0.4975859991778830 | 0.3747747609903402 | 0.2366907104311190 | T | T | T |
| 0.9985512982660905 | 0.3748172287820064 | 0.2374171480295534 | T | T | T |
| 0.2503478427405019 | 0.3749849227896767 | 0.2373799784427237 | T | T | T |
| 0.7500509518018946 | 0.3748035108691424 | 0.2371988049784974 | T | T | T |
| 0.4996763399963082 | 0.6257436692544476 | 0.2261067487144352 | T | T | T |
| 0.9997231745792213 | 0.6249085785096581 | 0.2267280359264812 | T | T | T |
| 0.2497434474864166 | 0.6249189562903380 | 0.2267639952156497 | T | T | T |
| 0.7498193295672066 | 0.6251128293285209 | 0.2268036902875388 | T | T | T |
| 0.0007110797587814 | 0.8751478269829229 | 0.2374091955075847 | T | T | T |
| 0.5006779589019926 | 0.8754410782590724 | 0.2367561517272357 | T | T | T |
| 0.2486726589294696 | 0.8749057693282548 | 0.2371371673344777 | T | T | T |
| 0.7487895218236607 | 0.8757901284978544 | 0.2374189174534941 | T | T | T |
| 0.2410571901081148 | 0.0055294464883075 | 0.2960638814404302 | T | T | T |
| 0.7398987341651263 | 0.0069374291063237 | 0.2964193477387691 | T | T | T |
| 0.0076110672885792 | 0.0056794974221299 | 0.2967206317285275 | T | T | T |
| 0.5088582078249925 | 0.0054452210642414 | 0.2965026948871578 | T | T | T |
| 0.4954315029618983 | 0.2462407042599012 | 0.2995987838850835 | T | T | T |
| 0.9911589466101186 | 0.2442761311360148 | 0.2966620689897705 | T | T | T |
| 0.2569656326094142 | 0.2439011804498968 | 0.2958752239579188 | T | T | T |
| 0.7561487290199124 | 0.2416612744271145 | 0.2928939627284671 | T | T | T |
| 0.4910095606252931 | 0.5063313777000789 | 0.2954782123690463 | T | T | T |
| 0.9913688436211421 | 0.5055263930086903 | 0.2964775807960564 | T | T | T |
| 0.2578655847728096 | 0.5056068881658230 | 0.2964895910283946 | T | T | T |
| 0.7575503703857153 | 0.5054986084561680 | 0.2965540999610540 | T | T | T |
| 0.0077365938220974 | 0.7443235837146785 | 0.2963714265095612 | T | T | T |
| 0.5076567428492776 | 0.7448113091855021 | 0.2961273972443648 | T | T | T |
| 0.2414981191738563 | 0.7443793924996968 | 0.2964373038038731 | T | T | T |
| 0.7415432718080824 | 0.7448323894260623 | 0.2963910180273792 | T | T | T |
| 0.1247544461547204 | 0.0403986926316616 | 0.3651373127102342 | T | T | T |

|                    |                    |                    |   |   |   |
|--------------------|--------------------|--------------------|---|---|---|
| 0.6227753707137319 | 0.0338435258710418 | 0.3687767194251692 | T | T | T |
| 0.3746842974166370 | 0.0605671628750996 | 0.3295860508605173 | T | T | T |
| 0.8739176398726722 | 0.0627237822137034 | 0.3301791105270878 | T | T | T |
| 0.1239876114721453 | 0.1873727589913742 | 0.3311241786346257 | T | T | T |
| 0.6347786813011439 | 0.1907092627878210 | 0.3498500620065837 | T | T | T |
| 0.3741815151297984 | 0.2062714832076050 | 0.3625131538595716 | T | T | T |
| 0.8724816453153669 | 0.2094858039947970 | 0.3629659125229665 | T | T | T |
| 0.3749734444460723 | 0.5405470030876086 | 0.3650335342892457 | T | T | T |
| 0.8745009433776619 | 0.5406656595937389 | 0.3651362224524008 | T | T | T |
| 0.1245822478683961 | 0.5621335578005385 | 0.3308888832155660 | T | T | T |
| 0.6242998904703382 | 0.5631451992402434 | 0.3304312236229028 | T | T | T |
| 0.3746686679217897 | 0.6878148942105728 | 0.3308462659682486 | T | T | T |
| 0.8745115525780019 | 0.6878325717269222 | 0.3309392274751912 | T | T | T |
| 0.1245973434691777 | 0.7091397639446347 | 0.3649660849002218 | T | T | T |
| 0.6244497834737347 | 0.7100553808612734 | 0.3649436757482379 | T | T | T |
| 0.0000000000000000 | 0.1711556604610038 | 0.0044115607758073 | F | F | F |
| 0.5000000000000000 | 0.1711556604610038 | 0.0044115607758073 | F | F | F |
| 0.0000000000000000 | 0.3288443714619048 | 0.0044115607758073 | F | F | F |
| 0.5000000000000000 | 0.3288443714619048 | 0.0044115607758073 | F | F | F |
| 0.0000000000000000 | 0.4211558299644409 | 0.0044115607758073 | F | F | F |
| 0.5000000000000000 | 0.4211558299644409 | 0.0044115607758073 | F | F | F |
| 0.0000000000000000 | 0.0788442019584679 | 0.0044115607758073 | F | F | F |
| 0.5000000000000000 | 0.0788442019584679 | 0.0044115607758073 | F | F | F |
| 0.2500001695034015 | 0.0788442019584679 | 0.0044115607758073 | F | F | F |
| 0.7500001695034015 | 0.0788442019584679 | 0.0044115607758073 | F | F | F |
| 0.2500001695034015 | 0.1711556604610038 | 0.0044115607758073 | F | F | F |
| 0.7500001695034015 | 0.1711556604610038 | 0.0044115607758073 | F | F | F |
| 0.2500001695034015 | 0.3288443714619048 | 0.0044115607758073 | F | F | F |
| 0.7500001695034015 | 0.3288443714619048 | 0.0044115607758073 | F | F | F |
| 0.2500001695034015 | 0.4211558299644409 | 0.0044115607758073 | F | F | F |
| 0.7500001695034015 | 0.4211558299644409 | 0.0044115607758073 | F | F | F |
| 0.0000000000000000 | 0.6711556923839126 | 0.0044115607758073 | F | F | F |
| 0.5000000000000000 | 0.6711556923839126 | 0.0044115607758073 | F | F | F |
| 0.0000000000000000 | 0.8288444033848066 | 0.0044115607758073 | F | F | F |
| 0.5000000000000000 | 0.8288444033848066 | 0.0044115607758073 | F | F | F |
| 0.0000000000000000 | 0.9211558618873497 | 0.0044115607758073 | F | F | F |
| 0.5000000000000000 | 0.9211558618873497 | 0.0044115607758073 | F | F | F |
| 0.0000000000000000 | 0.5788442338813695 | 0.0044115607758073 | F | F | F |
| 0.5000000000000000 | 0.5788442338813695 | 0.0044115607758073 | F | F | F |
| 0.2500001695034015 | 0.5788442338813695 | 0.0044115607758073 | F | F | F |
| 0.7500001695034015 | 0.5788442338813695 | 0.0044115607758073 | F | F | F |
| 0.2500001695034015 | 0.6711556923839126 | 0.0044115607758073 | F | F | F |
| 0.7500001695034015 | 0.6711556923839126 | 0.0044115607758073 | F | F | F |
| 0.2500001695034015 | 0.8288444033848066 | 0.0044115607758073 | F | F | F |
| 0.7500001695034015 | 0.8288444033848066 | 0.0044115607758073 | F | F | F |
| 0.2500001695034015 | 0.9211558618873497 | 0.0044115607758073 | F | F | F |
| 0.7500001695034015 | 0.9211558618873497 | 0.0044115607758073 | F | F | F |
| 0.5894972742763988 | 0.2322466987419627 | 0.4592040468610948 | T | T | T |
| 0.5039079249689943 | 0.3304980044684103 | 0.3931892760346294 | T | T | T |
| 0.6867661009132336 | 0.2925157077003054 | 0.4351053766983978 | T | T | T |
| 0.6031261121227829 | 0.3672971396270091 | 0.3532450919857845 | T | T | T |
| 0.6250723905513190 | 0.2625335106788894 | 0.4210251927052976 | T | T | T |
| 0.5702689169320201 | 0.3142463870055157 | 0.3779050726167186 | T | T | T |

Ethylene sublayer mode: E(PBE-D3) = -659.94526 eV, E(HSE06-D3) = -763.02194 eV

1.000000000000000



15.3244190216000007 0.0000000000000000 0.0000000000000000  
0.0000000000000000 15.3244190216000007 0.0000000000000000  
0.0000000000000000 0.0000000000000000 21.6720008849999992

Si H C

96 36 2

Selective dynamics

Direct

|                    |                    |                    |   |   |   |
|--------------------|--------------------|--------------------|---|---|---|
| 0.0000000000000000 | 0.0000000000000000 | 0.0438344616013850 | F | F | F |
| 0.5000000000000000 | 0.0000000000000000 | 0.0438344616013850 | F | F | F |
| 0.0000000000000000 | 0.2500001695033731 | 0.0438344616013850 | F | F | F |
| 0.5000000000000000 | 0.2500001695033731 | 0.0438344616013850 | F | F | F |
| 0.2500001695034015 | 0.0000000000000000 | 0.0438344616013850 | F | F | F |
| 0.7500001695034015 | 0.0000000000000000 | 0.0438344616013850 | F | F | F |
| 0.0000000000000000 | 0.5000000319229088 | 0.0438344616013850 | F | F | F |
| 0.5000000000000000 | 0.5000000319229088 | 0.0438344616013850 | F | F | F |
| 0.2500001695034015 | 0.2500001695033731 | 0.0438344616013850 | F | F | F |
| 0.7500001695034015 | 0.2500001695033731 | 0.0438344616013850 | F | F | F |
| 0.0000000000000000 | 0.7500002014262819 | 0.0438344616013850 | F | F | F |
| 0.5000000000000000 | 0.7500002014262819 | 0.0438344616013850 | F | F | F |
| 0.2500001695034015 | 0.5000000319229088 | 0.0438344616013850 | F | F | F |
| 0.7500001695034015 | 0.5000000319229088 | 0.0438344616013850 | F | F | F |
| 0.2500001695034015 | 0.7500002014262819 | 0.0438344616013850 | F | F | F |
| 0.7500001695034015 | 0.7500002014262819 | 0.0438344616013850 | F | F | F |
| 0.1249999139362856 | 0.0000000000000000 | 0.1063344564968744 | F | F | F |
| 0.6249999139362927 | 0.0000000000000000 | 0.1063344564968744 | F | F | F |
| 0.1249999139362856 | 0.2500001695033731 | 0.1063344564968744 | F | F | F |
| 0.6249999139362927 | 0.2500001695033731 | 0.1063344564968744 | F | F | F |
| 0.3750000834396943 | 0.0000000000000000 | 0.1063344564968744 | F | F | F |
| 0.8750000834396942 | 0.0000000000000000 | 0.1063344564968744 | F | F | F |
| 0.1249999139362856 | 0.5000000319229088 | 0.1063344564968744 | F | F | F |
| 0.6249999139362927 | 0.5000000319229088 | 0.1063344564968744 | F | F | F |
| 0.3750000834396943 | 0.2500001695033731 | 0.1063344564968744 | F | F | F |
| 0.8750000834396942 | 0.2500001695033731 | 0.1063344564968744 | F | F | F |
| 0.1249999139362856 | 0.7500002014262819 | 0.1063344564968744 | F | F | F |
| 0.6249999139362927 | 0.7500002014262819 | 0.1063344564968744 | F | F | F |
| 0.3750000834396943 | 0.5000000319229088 | 0.1063344564968744 | F | F | F |
| 0.8750000834396942 | 0.5000000319229088 | 0.1063344564968744 | F | F | F |
| 0.3750000834396943 | 0.7500002014262819 | 0.1063344564968744 | F | F | F |
| 0.8750000834396942 | 0.7500002014262819 | 0.1063344564968744 | F | F | F |
| 0.1266123537315544 | 0.1242894396801080 | 0.1657442365324046 | T | T | T |
| 0.6252972549083148 | 0.1250654171662662 | 0.1666677822816232 | T | T | T |
| 0.3821917233921854 | 0.1266841651677858 | 0.1688709671352213 | T | T | T |
| 0.8778891720085057 | 0.1249978295030671 | 0.1655943954012523 | T | T | T |
| 0.3701249014225846 | 0.3758305429111863 | 0.1693643500709217 | T | T | T |
| 0.8720945243675250 | 0.3743245081035910 | 0.1722909198498551 | T | T | T |
| 0.1224656082794222 | 0.3749153569692494 | 0.1728774615850621 | T | T | T |
| 0.6226166152998424 | 0.3748790212176853 | 0.1728301872555904 | T | T | T |
| 0.3745822769550101 | 0.6245952629655617 | 0.1657691897578946 | T | T | T |
| 0.8748994592868730 | 0.6241923808959979 | 0.1659780201814916 | T | T | T |
| 0.1248132919475203 | 0.6255423460966199 | 0.1659912209108088 | T | T | T |
| 0.6251878150403644 | 0.6256468277437987 | 0.1658241331121500 | T | T | T |
| 0.1260775324446069 | 0.8747552318796201 | 0.1713167878875373 | T | T | T |
| 0.6256852894886055 | 0.8747754861087792 | 0.1712354423327258 | T | T | T |
| 0.3763039776319874 | 0.8752682560858686 | 0.1729367580591672 | T | T | T |
| 0.8770803441599490 | 0.8742190164592162 | 0.1718278181252864 | T | T | T |
| 0.0022324456217484 | 0.1236630827225593 | 0.2274316940289820 | T | T | T |
| 0.5071956236632124 | 0.1333828163382193 | 0.2351488359510898 | T | T | T |

|                    |                    |                    |   |   |   |
|--------------------|--------------------|--------------------|---|---|---|
| 0.2528144938574158 | 0.1242507449301615 | 0.2249523746465998 | T | T | T |
| 0.7524355047002689 | 0.1211845193140483 | 0.2238389565478325 | T | T | T |
| 0.4923019806727926 | 0.3793622711263541 | 0.2331699973569475 | T | T | T |
| 0.9963624446218771 | 0.3736103024522140 | 0.2380246748920258 | T | T | T |
| 0.2480584157400258 | 0.3755866945134420 | 0.2368173238018259 | T | T | T |
| 0.7472072928780433 | 0.3713930927588231 | 0.2389293820975111 | T | T | T |
| 0.4998238126577558 | 0.6283229254917679 | 0.2260007783744146 | T | T | T |
| 0.9998082268787885 | 0.6239049115133739 | 0.2267897450975970 | T | T | T |
| 0.2498170707627273 | 0.6250290498252075 | 0.2266519005094657 | T | T | T |
| 0.7499828735089680 | 0.6225607666266267 | 0.2267240852902616 | T | T | T |
| 0.0023600312892051 | 0.8736760010629976 | 0.2371586981012242 | T | T | T |
| 0.5025052587343466 | 0.8781472234714724 | 0.2380485518387931 | T | T | T |
| 0.2501533205880423 | 0.8747389695060043 | 0.2368931427598594 | T | T | T |
| 0.7516327327178363 | 0.8706964174658487 | 0.2347484232140714 | T | T | T |
| 0.2457302880084035 | 0.0058797775252469 | 0.2948260563377074 | T | T | T |
| 0.7483075522003131 | 0.0003914974269834 | 0.2918051361921297 | T | T | T |
| 0.0128100564716839 | 0.0031357494258918 | 0.2971952360998654 | T | T | T |
| 0.5155227588637773 | 0.0076772497079138 | 0.2997597958594538 | T | T | T |
| 0.4858804884293887 | 0.2598891081064186 | 0.3012766134565065 | T | T | T |
| 0.9871818302116590 | 0.2430174128334725 | 0.2982496172752252 | T | T | T |
| 0.2511688380869534 | 0.2432035124533494 | 0.2933365608139644 | T | T | T |
| 0.7546436571534344 | 0.2351094589359495 | 0.2939466225274921 | T | T | T |
| 0.4892559841114563 | 0.5082461783594836 | 0.2943088836825868 | T | T | T |
| 0.9904281547038990 | 0.5046219803436156 | 0.2969584142851325 | T | T | T |
| 0.2570229840084301 | 0.5058054758725755 | 0.2962207665925096 | T | T | T |
| 0.7560575587838488 | 0.5034164450728169 | 0.2969365205089767 | T | T | T |
| 0.0084746474612885 | 0.7432058936943383 | 0.2965990517434316 | T | T | T |
| 0.5085350148670709 | 0.7466894703127007 | 0.2966382196215124 | T | T | T |
| 0.2421622446096865 | 0.7444254934240675 | 0.2961862802731054 | T | T | T |
| 0.7423382878443154 | 0.7423534316184747 | 0.2958429589969359 | T | T | T |
| 0.1295118830746683 | 0.0388026280927791 | 0.3653589014086818 | T | T | T |
| 0.6382830611300969 | 0.0150476590713413 | 0.3687191334661851 | T | T | T |
| 0.3788533988820837 | 0.0621820762867923 | 0.3299438104072813 | T | T | T |
| 0.8793262339113304 | 0.0589726476276203 | 0.3295293906794378 | T | T | T |
| 0.1199362298297804 | 0.1855111627666763 | 0.3305266389000920 | T | T | T |
| 0.6492313497538177 | 0.1663579667905606 | 0.3566673486114105 | T | T | T |
| 0.3668061903485492 | 0.2075441472365611 | 0.3605628766123466 | T | T | T |
| 0.8707503537084370 | 0.2046345400110611 | 0.3663734200371271 | T | T | T |
| 0.3743036026699201 | 0.5411308330392720 | 0.3647666955851140 | T | T | T |
| 0.8733934176327907 | 0.5394807068717077 | 0.3653029848733259 | T | T | T |
| 0.1237731282241953 | 0.5618280964343957 | 0.3309152816927552 | T | T | T |
| 0.6228837746762946 | 0.5623369210591761 | 0.3300163258746343 | T | T | T |
| 0.3754315858055020 | 0.6885096561147906 | 0.3307048116710500 | T | T | T |
| 0.8751666914519362 | 0.6865056085784765 | 0.3309741640086308 | T | T | T |
| 0.1254348901886498 | 0.7088475374610324 | 0.3650626424971848 | T | T | T |
| 0.6251688307159612 | 0.7093894947241172 | 0.3648662718653766 | T | T | T |
| 0.0000000000000000 | 0.1711556604610038 | 0.0044115607758073 | F | F | F |
| 0.5000000000000000 | 0.1711556604610038 | 0.0044115607758073 | F | F | F |
| 0.0000000000000000 | 0.3288443714619048 | 0.0044115607758073 | F | F | F |
| 0.5000000000000000 | 0.3288443714619048 | 0.0044115607758073 | F | F | F |
| 0.0000000000000000 | 0.4211558299644409 | 0.0044115607758073 | F | F | F |
| 0.5000000000000000 | 0.4211558299644409 | 0.0044115607758073 | F | F | F |
| 0.0000000000000000 | 0.0788442019584679 | 0.0044115607758073 | F | F | F |
| 0.5000000000000000 | 0.0788442019584679 | 0.0044115607758073 | F | F | F |
| 0.2500001695034015 | 0.0788442019584679 | 0.0044115607758073 | F | F | F |
| 0.7500001695034015 | 0.0788442019584679 | 0.0044115607758073 | F | F | F |
| 0.2500001695034015 | 0.1711556604610038 | 0.0044115607758073 | F | F | F |

|                    |                    |                    |   |   |   |
|--------------------|--------------------|--------------------|---|---|---|
| 0.7500001695034015 | 0.1711556604610038 | 0.0044115607758073 | F | F | F |
| 0.2500001695034015 | 0.3288443714619048 | 0.0044115607758073 | F | F | F |
| 0.7500001695034015 | 0.3288443714619048 | 0.0044115607758073 | F | F | F |
| 0.2500001695034015 | 0.4211558299644409 | 0.0044115607758073 | F | F | F |
| 0.7500001695034015 | 0.4211558299644409 | 0.0044115607758073 | F | F | F |
| 0.0000000000000000 | 0.6711556923839126 | 0.0044115607758073 | F | F | F |
| 0.5000000000000000 | 0.6711556923839126 | 0.0044115607758073 | F | F | F |
| 0.0000000000000000 | 0.8288444033848066 | 0.0044115607758073 | F | F | F |
| 0.5000000000000000 | 0.8288444033848066 | 0.0044115607758073 | F | F | F |
| 0.0000000000000000 | 0.9211558618873497 | 0.0044115607758073 | F | F | F |
| 0.5000000000000000 | 0.9211558618873497 | 0.0044115607758073 | F | F | F |
| 0.0000000000000000 | 0.5788442338813695 | 0.0044115607758073 | F | F | F |
| 0.5000000000000000 | 0.5788442338813695 | 0.0044115607758073 | F | F | F |
| 0.2500001695034015 | 0.5788442338813695 | 0.0044115607758073 | F | F | F |
| 0.7500001695034015 | 0.5788442338813695 | 0.0044115607758073 | F | F | F |
| 0.2500001695034015 | 0.6711556923839126 | 0.0044115607758073 | F | F | F |
| 0.7500001695034015 | 0.6711556923839126 | 0.0044115607758073 | F | F | F |
| 0.2500001695034015 | 0.8288444033848066 | 0.0044115607758073 | F | F | F |
| 0.7500001695034015 | 0.8288444033848066 | 0.0044115607758073 | F | F | F |
| 0.2500001695034015 | 0.9211558618873497 | 0.0044115607758073 | F | F | F |
| 0.7500001695034015 | 0.9211558618873497 | 0.0044115607758073 | F | F | F |
| 0.5424261024048758 | 0.2108266970304702 | 0.4372244671992777 | T | T | T |
| 0.5119510458400307 | 0.3564767683687484 | 0.3872080154812584 | T | T | T |
| 0.6404374598097669 | 0.2729423544303159 | 0.4455409140777058 | T | T | T |
| 0.6112422796182877 | 0.3492926904909387 | 0.3448492174954626 | T | T | T |
| 0.5950097548742039 | 0.2441688373188841 | 0.4118015060296786 | T | T | T |
| 0.5584595690848200 | 0.3102502599780887 | 0.3656655327059736 | T | T | T |
